---

1 **Genomic features and evolution of the conditionally dispensable**  
2 **chromosome in the tangerine pathotype of *Alternaria alternata***

3

4 **Mingshuang Wang<sup>1,2</sup>, Huilan Fu<sup>1</sup>, Xing-Xing Shen<sup>2</sup>, Ruoxin Ruan<sup>3</sup>, Nicholas Pun<sup>4</sup>, Jianping Xu<sup>4</sup>,**

5 **Hongye Li<sup>1\*</sup> and Antonis Rokas<sup>2\*</sup>**

6

7 <sup>1</sup>Institute of Biotechnology, Zhejiang University, Hangzhou 310058, China

8 <sup>2</sup>Department of Biological Sciences, Vanderbilt University, Nashville, Tennessee 37235, USA

9 <sup>3</sup>Hangzhou Academy of Agricultural Sciences, Hangzhou 310024, China

10 <sup>4</sup>Department of Biology, McMaster University, Hamilton, Ontario L8S 4K1, Canada

11

12 \*Corresponding authors: Hongye Li and Antonis Rokas

13 E-mail address: [hyli@zju.edu.cn](mailto:hyli@zju.edu.cn) (H. Li); [antonis.rokas@vanderbilt.edu](mailto:antonis.rokas@vanderbilt.edu) (A. Rokas)

---

14 **Abstract**

15       The tangerine pathotype of the ascomycete fungus *Alternaria alternata* is the  
16 causal agent of citrus brown spot, which can result in significant losses of both yield  
17 and marketability for tangerines and tangerine hybrids worldwide. A conditionally  
18 dispensable chromosome (CDC), which harbors the host-selective ACT toxin gene  
19 cluster, is required for tangerine pathogenicity of *A. alternata*. To understand the  
20 genetic makeup and evolution of the tangerine pathotype CDC, we analyzed the  
21 function and evolution of the CDC genes present in the *A. alternata* Z7 strain. The  
22 1.84Mb long CDC contains 512 predicted protein-coding genes, which are enriched in  
23 functional categories associated with ‘metabolic process’ (132 genes, p-value =  
24 0.00192) including ‘oxidation-reduction process’ (48 genes, p-value = 0.00021) and  
25 ‘lipid metabolic process’ (11 genes, p-value = 0.04591). Relatively few of the CDC  
26 genes can be classified as CAZymes (13), kinases (3) and transporters (20).  
27 Differential transcriptome analysis of H<sub>2</sub>O<sub>2</sub> treatment and control conditions revealed  
28 that 29 CDC genes were significantly up-regulated and 14 were significantly down-  
29 regulated, suggesting that CDC genes may play a role in coping with oxidative stress.  
30 Evolutionary analysis of the 512 CDC proteins showed that their evolutionary  
31 conservation tends to be restricted within the genus *Alternaria* and that the CDC  
32 genes evolve faster than genes in the essential chromosomes. Interestingly,  
33 phylogenetic analysis suggested that the genes of 13 enzymes and one sugar  
34 transporter residing in the CDC were likely horizontally transferred from distantly  
35 related species. Among these genes, 5 were likely transferred as a physically linked  
36 cluster of genes from *Cryptococcus* (Basidiomycota) or *Penicillium* (Eurotiomycetes)  
37 and another 4 genes might have been transferred from *Colletotrichum*  
38 (Sordariomycetes). One carboxylesterase gene was transferred from bacteria but  
39 functionally knocking out this gene did not affect the pathogenicity of the Z7 strain.

40 These results provide new insights into the function and evolution of CDC genes in

41 *Alternaria*.

42

43 **Keywords:** plant pathogen, Dothideomycetes, accessory chromosome, evolutionary

44 origin, horizontal gene transfer

---

## 45 **Introduction**

46 *Alternaria alternata* fungi can be ubiquitously found in soil, various plants, and  
47 decaying plant debris (Thomma, 2003). Some *A. alternata* strains, which are known  
48 as pathotypes, can cause plant diseases and result in severe crop losses worldwide.  
49 Specifically, at least seven pathogenic *A. alternata* pathotypes, each producing a  
50 unique host-selective toxin (HST) essential to pathogenicity, have been recognized to  
51 cause diseases in Japanese pear, strawberry, tangerine, apple, tomato, rough lemon  
52 and tobacco (Tsuge et al., 2013). Generally, genes required for HST biosynthesis are  
53 clustered on relatively small chromosomes of 1.0 ~ 2.0 Mb in size in *A. alternata*  
54 (Tsuge et al., 2013). These chromosomes, also known as conditionally dispensable  
55 chromosomes (CDCs), are highly variable among species and are required for  
56 pathogenicity in *A. alternata*. However, CDCs are generally not required for fungal  
57 growth and reproduction on artificial media (Johnson et al., 2001; Hatta et al., 2002).

58

59 The importance of CDCs conferring pathogenicity to fruits has been  
60 demonstrated by the construction of *A. alternata* hybrids in laboratory conditions.  
61 More specifically, two distinct laboratory hybrids were constructed from tomato and  
62 strawberry pathotypes and separately for apple and tomato pathotypes. The resulting  
63 hybrids harbored two CDCs from their parents allowing for the production of HSTs  
64 that caused diseases in both parental plant species (Akamatsu et al., 2001; Akagi et  
65 al., 2009b). Furthermore, these studies support the hypothesis that CDCs can be  
66 transmitted between different strains thereby facilitating the spread and evolutionary  
67 diversification of fungal phytopathogens.

68

69 Besides *A. alternata*, many other fungal phytopathogens have CDCs in their  
70 genomes including *Fusarium oxysporum*, *Nectria haematococca*, *Zymoseptoria tritici*

---

71 (previously known as *Mycosphaerella graminicola* and *Septoria tritici*), and  
72 *Colletotrichum gloeosporioides* (Coleman et al., 2009; Ma et al., 2010; Stukenbrock  
73 et al., 2010). Because CDCs are typically found in some, but not all, strains, they have  
74 been proposed to have different evolutionary origins than the essential chromosomes  
75 (Covert, 1998; Tsuge et al., 2013), e.g., through horizontal transfer from distantly  
76 related species (Covert, 1998; Hatta et al., 2002). The possibility of horizontal transfer  
77 of CDCs between species has been demonstrated in several studies. For example, a 2-  
78 Mb chromosome was transferred between two different biotypes of *C.*  
79 *gloeosporioides* during vegetative co-cultivation in the laboratory (He et al., 1998).  
80 Importantly, CDC acquisition can facilitate the transition from the non-pathogenic to  
81 pathogenic phenotype in the recipient organism. For example, co-incubation of non-  
82 pathogenic and pathogenic genotypes of *F. oxysporum* revealed that the transfer of a  
83 CDC from the pathogenic (donor) to non-pathogenic genotype (recipient) enabled the  
84 recipient to become pathogenic to tomatoes (Ma et al., 2010).

85

86 Previously, the ~1.0 Mb CDC of the tomato pathotype of *A. alternata* has been  
87 identified and characterized (Hu et al., 2012). Genes in that CDC are abundant in the  
88 categories of “metabolic process” and “biosynthetic process”, and include 36  
89 polyketide and non-ribosomal peptide synthetase domain-containing genes;  
90 furthermore, the GC content of third codon positions, codon usage bias, and repeat  
91 region load in the CDC are different from that in the essential chromosomes (Hu et  
92 al., 2012). The authors also provided evidence supporting that the *A. arborescens*  
93 CDC was acquired through horizontal transfer from an unrelated fungus (Hu et al.,  
94 2012). Finally, a recent study claimed the availability of almost complete sequences  
95 of the CD chromosomes from the strawberry, apple and tomato pathotypes of  
96 *A. alternata* and the presence of large syntenic regions among the three CD

97 chromosomes, but did not provide any evidence (Tsuge et al., 2016).

98

99 The tangerine pathotype of *A. alternata*, which can cause citrus brown spot on  
100 tangerines and tangerine hybrids, was demonstrated to harbour an additional  
101 chromosome of about 1.9~2.0Mb by pulse-field gel electrophoresis studies  
102 (Miyamoto et al., 2008; Miyamoto et al., 2009). Seven genes, *ACTTR*, *ACTT2*,  
103 *ACTT3*, *ACTT5*, *ACTT6*, *ACTT2S2* and *ACTT2S3*, were located onto this chromosome  
104 and found to be required for the biosynthesis of the ACT-toxin, a unique HST  
105 produced by the tangerine pathotype (Tsuge et al., 2013). However, relatively little is  
106 known about the content, potential biological functions, and evolution of the other  
107 genes in the CDC of the tangerine pathotype of *A. alternata*. To address this question,  
108 we examined the functional annotation, transcriptional activity, and evolution of all  
109 512 genes in the CDC of the tangerine pathotype strain Z7 of *A. alternata*. We found  
110 that these genes are enriched in functions associated with ‘metabolic process’.  
111 Furthermore, 43 CDC genes were differentially expressed in response to oxidative  
112 stress. Finally, we found that conservation for the majority of the 512 Z7 CDC genes  
113 was restricted to the genus *Alternaria* and that 14 CDC genes likely originated via  
114 horizontal gene transfer (HGT) events from other fungi or bacteria. These results  
115 suggest that CDC genes in *Alternaria* are involved in processes associated with  
116 metabolism, that they are rapidly evolving, and that they sometimes originate via  
117 HGT.

118

## 119 **Material and Methods**

120

### 121 **Genomic and transcriptomic data retrieval**

122 The assembled *A. alternata* Z7 genome and proteome were downloaded from

---

123 GenBank under the accession number LPVP000000000 (Wang et al., 2016). Genome  
124 data from other *Alternaria* species were downloaded from the *Alternaria* genomes  
125 database (Dang et al., 2015) and from other species of Dothideomycetes from the  
126 GenBank database (Table S1) (last access on April 15, 2017). The transcriptome data  
127 of *A. alternata* after H<sub>2</sub>O<sub>2</sub> treatment were downloaded from the NCBI's Sequence  
128 Read Archive (SRA) database with accession number SRP071688 (last access on  
129 May 8, 2017).

130

### 131 **Identification of the contigs comprising the CDC**

132 To identify all the contigs that are part of the *A. alternata* Z7 CDC, we used a  
133 previously described method with slight modifications (Hu et al., 2012). Briefly, all *A.*  
134 *alternata* Z7 contigs with sequence lengths greater than 5 kb were aligned to contigs  
135 from *Alternaria brassicicola*, a species that belongs to the same genus as *A. alternata*  
136 but which does not carry CDCs, using MUMmer 3.0 with an identity cut-off at 80%  
137 (Delcher et al., 2003). All contigs whose sequence coverage when aligned to *A.*  
138 *brassicicola* was less than 20% were considered to be parts of the *A. alternata* Z7  
139 CDC.

140

### 141 **Functional annotation of the genes in the CDC**

142 To functionally annotate the 512 genes (and their protein products) in the CDC,  
143 we performed gene ontology analysis using the topGO version 2.28.0 (Alexa and  
144 Rahnenfuhrer, 2016) and classified the 512 proteins into protein families using the  
145 Pfam, version 31.0 databases (last access on June 1, 2016) (Finn et al., 2014). We  
146 predicted CDC genes that were parts of fungal secondary metabolite pathways using  
147 the web-based analytical tool SMURF (<http://www.jcvi.org/smurf/index.php>, last  
148 access on Jun 20, 2016) (Khaldi et al., 2010). To identify CDC proteins that are

---

149 carbohydrate-active enzymes, we searched with the CAZymes Analysis Toolkit  
150 (<http://www.cazy.org/>, last access on Jul 10, 2016) based on sequence and Pfam  
151 annotation (Lombard et al., 2014). To identify secreted proteins, we used SignalP,  
152 version 4.1 to predict transmembrane domains (Petersen et al., 2011) and we excluded  
153 non-extracellular and GPI-anchored proteins by using ProtComp, version 5 (Klee and  
154 Ellis, 2005) and fragAnchor  
155 (<http://navet.ics.hawaii.edu/~fraganchor/NNHMM/NNHMM.html>, last access on July  
156 10, 2016) (Poisson et al., 2007), respectively. All resulting secreted proteins that were  
157 shorter than 200 amino acids (aa) in length and contained at least 4 cysteine residues  
158 were considered as small secreted cysteine-rich proteins. Kinases were searched and  
159 classified by an automated pipeline (Kosti et al., 2010). Cytochrome P450s were  
160 classified based on Pfam and the P450 database, version 1.2 (last access on June 18,  
161 2016) (Moktali et al., 2012). Transporters were identified by performing BLASTp  
162 against the Transporter Classification Database (last access on June 7, 2016) (Saier et  
163 al., 2016).

164

### 165 **Species phylogeny inference and evaluation of sequence conservation of CDC** 166 **genes across Dothideomycetes**

167 To understand the origin and evolution of genes in the *A. alternata* CDC, we first  
168 constructed a species phylogeny using genomic data from all available *Alternaria*  
169 species as well as for representative species from other Dothideomycetes. We  
170 constructed the species phylogeny using 1,754 conserved, fungal BUSCO genes as  
171 described previously (Simao et al., 2015; Shen et al., 2016). Briefly, the gene  
172 structure of each genome was predicted by AUGUSTUS 3.1 (Stanke and Waack,  
173 2003), then the sequences of these predicted genes were aligned to the HMM  
174 alignment profile of each BUSCO gene in the OrthoDB v9 database (Simao et al.,



---

175 2015), and the ones with alignment bit-scores higher than 90% of the lowest bit-score  
176 among the reference genomes were kept for tree construction. The isolates *Alternaria*  
177 *porri* BMP0178 and *Alternaria destruens* BMP0317 were excluded from downstream  
178 analyses due to their poor (<60%) coverage of BUSCO genes (Table S2). We also  
179 compared the sequence similarity of each of the 512 CDC proteins to proteins in the  
180 genomes of other Dothideomycetes by calculating the value of BLAST identity \*  
181 query coverage.

182

183 **Examination of relative evolutionary rate between genes in the CDC and genes**  
184 **in the essential chromosomes**

185 To estimate the relative evolutionary rate between Z7 CDC and essential  
186 chromosomes (ECs), ortholog groups within the *Alternaria* Clade I containing Z7  
187 proteins from both CDC and ECs were extracted using OrthoMCL v2.0.9 and  
188 reciprocal BLASTp with identity>50% and query coverage >50% as cut-offs (Chen et  
189 al., 2006). For each ortholog group containing more than 7 (50% of total number)  
190 species, only one sequence per isolate/species (the one that was the best hit to the Z7  
191 protein) was kept for further analysis. The coding sequences of those ortholog  
192 proteins were then aligned with MAFFT v7.023b using the E-INS-I strategy (Yamada  
193 et al., 2016) and trimmed with trimAl v1.4.rev11 using its automated1 strategy  
194 (Capella-Gutierrez et al., 2009). The maximum-likelihood (ML) phylogenetic trees  
195 were inferred using IQ-TREE 1.5.4, with the best model selected by ModelFinder  
196 (Nguyen et al., 2015; Kalyanamoorthy et al., 2017) and with 1,000 bootstrap  
197 replicates. The significance of the difference in the average total branch length of the  
198 ML phylogenetic trees of CDC genes against that of the EC genes was determined by  
199 Wilcoxon test.

200

---

201 **Identification of CDC genes that underwent HGT**

202 To detect gene candidates that experienced HGT in *A.alternata* Z7 CDC, we first  
203 performed a BLASTp search of the local NCBI's nonredundant protein database (nr,  
204 last access on May 21, 2017) using Z7 CDC proteins as queries. We next selected  
205 proteins with the following characteristics as HGT candidates for further phylogenetic  
206 analyses: a) an Alien Index (AI) score larger than 0 (Gladyshev et al., 2008;  
207 Wisecaver et al., 2016), b) at least 80% of the top 200 BLASTp hits of the query  
208 protein are from organisms other than Dothideomycetes, and c) the sequence identity  
209 of the query protein across its entire length to its best BLASTp hit is equal or greater  
210 than 50%.

211

212 All genes that fit these three criteria were used as query sequences in BLASTp  
213 searches against the nr database and phylogenetic trees of their most closely related  
214 sequences across the tree of life were constructed. To reduce the number of sequences  
215 used to build each phylogenetic tree, we kept only one sequence per species (the one  
216 with the best BLASTp hit to the HGT candidate), then we selected the top 200 hits  
217 from the Blast results. The resulting sequences were used as input for multiple  
218 sequence alignment, trimming and phylogenetic inference, which were performed as  
219 described above.

220

221 The phylogenetic tree of each HGT candidate was manually inspected and only  
222 those trees that were evidently incongruent with the species phylogeny and strongly  
223 supported (bootstrap value > 95%) were retained as HGT candidates. For those HGT  
224 candidates, we used the Consel software, version V0.1i (Shimodaira and Hasegawa,  
225 2001; Shimodaira, 2002) to perform the approximately unbiased (AU) comparative  
226 topology test between the unconstrained ML tree and the constrained ML tree in

---

227 which the *Alternaria* gene sequence was forced to be monophyletic with the rest of  
228 the sequences from Dothideomycetes. All phylogenetic trees were visualized using  
229 ITOL version 3.0 (Letunic and Bork, 2016).

230

### 231 **Deletion of a horizontally transferred gene**

232 The AALTg12037 gene was knocked out using a fungal protoplast  
233 transformation protocol, as described previously (Chen et al., 2017). Briefly, the two  
234 flanking 900bp fragments and a bacterial phosphotransferase B gene (HYG) were  
235 fused together, the resulting fragment was then introduced into fungal protoplasts  
236 using polyethylene glycol and CaCl<sub>2</sub>. The transformants growing on a medium  
237 supplemented with 150 µg/ml hygromycin were selected and examined by PCR with  
238 specific primer pairs. All the primers used in this study are listed in Table S3. Fungal  
239 virulence was assessed on *Citrus poonensis* and *Citrus × clementina* leaves inoculated  
240 by placing a 5mm plug taken from the media for 2 days. Each strain was tested on at  
241 least 5 leaves and experiments were repeated two times.

242

### 243 **Data availability**

244 All data generated in this study, including CDC contigs, CDC gene annotation,  
245 multiple sequence alignments and phylogenetic trees, have been deposited on the  
246 figshare repository at DOI: 10.6084/m9.figshare.5549077 (the data will be made  
247 publicly available upon acceptance of the manuscript).

248

## 249 **Results**

250

### 251 **General features of CDC**

252 To identify the genome content of CDC of the tangerine pathotype of *A. alternata*  
253 strain Z7, we compared the genome sequence of the Z7 strain to that of *A.*  
254 *brassicicola*, which is known to not have a CDC (see methods). This strategy  
255 identified 43CDC contigs with a combined total length of 1.84Mb, which is close to  
256 the CDC size estimated by the pulse-field electrophoresis experiment (1.9~2.0Mb)  
257 (Miyamoto et al., 2008; Miyamoto et al., 2009). The overall G+C content of the CDC  
258 was 47.7%, while that of the ECs was 51.2%. The percentage of repetitive sequences  
259 on the Z7 CDC was 1.23%, over 2-fold of that of ECs (0.51%). The average gene  
260 length and gene density of CDC were significantly smaller than those of ECs (Table  
261 1).

262

### 263 **Functional annotation of the genes in the CDC**

264 The CDC was predicted to comprise of 512 protein-coding genes. To predict  
265 their functions, gene ontology analysis was performed and 233 genes were assigned to  
266 154 gene ontology terms related to biological process. 132 genes are assigned to the  
267 GO term metabolic process (p-value 0.00192) (Figure 1). Within the metabolic  
268 process, the GO terms oxidation-reduction process (48, p-value 0.00021) and lipid  
269 metabolic process (11, p-value 0.04591) were also significantly enriched (Figure 1).  
270 The reduction-oxidation (redox)-associated genes include monooxygenase,  
271 dehydrogenase, and reductase, suggesting that the CDC may be involved in  
272 intracellular redox homeostasis.

273

274 To functionally annotate the 512 genes in the CDC, we classified their protein  
275 products into protein families using several different approaches. Based on Pfam  
276 domain characterization, 307 / 512 genes belonged to 195 protein families (Table S4).  
277 We identified 13 CAZyme genes in the CDC, accounting for 3.48% (13 / 373) of the

278 total CAZymes of Z7. These include 3 Glycosyl Transferases (GTs), 6 Glycoside  
279 Hydrolases (GHs) and 5 Auxiliary Activities (AAs) (Table S4). A total of 29 secreted  
280 proteins were predicted in the CDC, including 3 plant cell wall-degrading enzymes,  
281 10 small-secreted cysteine-rich proteins (SSCPs), 3 peptidases, 1 lipase, and 1 LysM  
282 domain-containing protein (Table S4). Only 3 kinases from 3 different kinase families  
283 were found in the CDC (Table S4). We identified 20 transcription factors in the CDC,  
284 which can be divided into 5 subfamilies: Zinc finger Zn<sub>2</sub>-Cys<sub>6</sub> (8), Zinc finger C<sub>2</sub>H<sub>2</sub>  
285 (5), Myb-like DNA-binding (1), helix-turn-helix, Psq (4) and high mobility group box  
286 (2) (Table S4). Twenty-six transporter-encoding genes were found in the CDC (Table  
287 S4). Among the 48 redox related genes in the CDC, 13 were predicted to be  
288 Cytochrome P450 monooxygenases. Based on comparisons with proteins in the PHI-  
289 database, 35 CDC proteins are related to pathogenicity (Table S4). Finally, the CDC  
290 contained the ACT-toxin biosynthetic gene cluster present only in the tangerine  
291 pathotype of *A. alternata*, which has been described in detail previously (Wang et al.,  
292 2016).

293

#### 294 **Expression of CDC genes under H<sub>2</sub>O<sub>2</sub> stress**

295 The production of the host-selective ACT toxin is crucial for the pathogenicity of  
296 the tangerine pathotype of *A. alternata* (Miyamoto et al., 2008; Miyamoto et al., 2009;  
297 Tsuge et al., 2013). Additionally, recent studies have shown that the ability to  
298 eliminate ROS by the tangerine pathotype of *A. alternata* is also of vital importance  
299 for pathogenesis to citrus (Lin et al., 2009; Chen et al., 2013; Yang et al., 2016). To  
300 discover which genes in the *A. alternata* Z7 CDC are potentially involved in coping  
301 with oxidative stress, we performed transcriptome analysis using the previously  
302 published transcriptome data of *A. alternata* Z7 after H<sub>2</sub>O<sub>2</sub> treatment using no H<sub>2</sub>O<sub>2</sub>  
303 treatment as a control (Wang et al., 2016).

304

305       Of the 512 CDC genes, 43 were significantly differentially expressed during the  
306 H<sub>2</sub>O<sub>2</sub> stress condition (Table 2, Table S5). These included 29 CDC genes that were  
307 significantly upregulated and 14 that were significantly downregulated. The set of  
308 upregulated genes includes proteins such as oxidoreductases, hydrolases, transcription  
309 factors and phosphatases. Interestingly, the polyketide synthase (AALT\_g11750,  
310 log<sub>2</sub>FC 3.3), which was hypothesized to be crucial for the biosynthesis of the ACT  
311 toxin (Miyamoto et al., 2010), was strongly induced after H<sub>2</sub>O<sub>2</sub> treatment. A cluster of  
312 four genes (AALT\_g11772, AALT\_g11773, AALT\_g11774 and AALT\_g11775)  
313 located on CDC was also highly upregulated (log<sub>2</sub>FC from 3.4 to 4.4) during H<sub>2</sub>O<sub>2</sub>  
314 stress. After comparing these four proteins to the Pfam database, proteins  
315 AALT\_g11772 and AALT\_g11774 were found to contain an oxidoreductase family  
316 domain and a NmrA-like family domain, respectively. However, no protein domain  
317 was predicted for AALT\_g11773 and AALT\_g11775 (Table 2, Table S5).

318

### 319 **The Evolutionary origin of the Z7 CDC**

320       To explore the evolutionary origin of the Z7 CDC, we compared the sequence  
321 similarity (calculated by BLAST identity score \* query coverage) of each of the 512  
322 CDC proteins to the protein sequences from the genomes of other species in the  
323 Dothideomycetes. In the species phylogeny, *Alternaria* species are grouped into three  
324 clades (I through III), which coincides with a previously constructed phylogeny based  
325 on 200 conserved single-copy orthologs (Wang et al., 2016). Proteins in the Z7 CDC  
326 showed a wide range of sequence similarity values to proteins in other  
327 Dothideomycetes (Figure 2). As expected, the highest degree of similarity was with  
328 proteins of other *Alternaria* species, and in particular with those from clade I (Figure  
329 2, Figure S1). For example, we found that 442 / 512 (86.3%) of the Z7 CDC proteins

---

330 (442, 86.3%) showed >50% similarity to proteins in *A. turkissafria* (Figure 2, Figure  
331 S1), which can also cause citrus brown spot. However, *A. citriarbusti* and *A.*  
332 *tangelonis* can also cause citrus brown spot but these exhibited much lower numbers  
333 (321 / 512, 62.7% and 310 / 512, 60.5%, respectively) of proteins with >50%  
334 similarity to proteins in Z7 CDC (Figure 2). These results suggest that the gene  
335 content and sequence similarity on CDC can be highly variable among strains of the  
336 same pathotype.

337

338 To examine if any of the Z7 CDC proteins were more similar to proteins outside  
339 those found in genomes from the genus *Alternaria*, a BLASTp search of those 512  
340 protein sequences against the NCBI non-redundant database was performed and the  
341 result was filtered using the E-value <1e-10 and sequence identity >30% criteria.  
342 Although the best matches for 330 / 512 proteins were proteins from other *Alternaria*  
343 species, 81 proteins had their best matches to be proteins found in non-*Alternaria*  
344 members from the family Pleosporaceae, 33 from the order Pleosporales (other than  
345 Pleosporaceae), 9 from the class Dothideomycetes (other than Pleosporales), 44 from  
346 the domain Fungi (other than Dothideomycetes), and 1 from the domain Bacteria  
347 (Table S6).

348

349 To further dissect the evolutionary history of Z7 CDC genes, we reconstructed  
350 the phylogenetic tree for each Z7 CDC gene with their orthologs from other species in  
351 the Dothideomycetes. There were too few orthologs to construct phylogenetic trees  
352 for three CDC genes; among the remaining 509 gene trees, 402 showed monophyly  
353 within the genus *Alternaria*. Taken together, our results suggest that most of the  
354 *A.alternata* Z7 CDC proteins were likely present in the *Alternaria* ancestor and that  
355 some of them were likely independently lost in some of the species during the

356 diversification of the genus.

357

### 358 **Relative evolutionary rate of Z7 CDC**

359 To figure out if genes in the CDC and genes in the ECs in Z7 evolve differently,  
360 we built a phylogenetic tree for each Z7 gene which has orthologs in more than 7  
361 (50% of total number) species within *Alternaria* Clade I. A total of 191 CDC and  
362 10,060 EC genes were used to calculate the average branch length for each tree. The  
363 average branch length for most genes in both the CDC and the ECs are very low  
364 (Figure 3), which indicates that most genes are highly conserved within the genus  
365 *Alternaria* Clade I. However, as a whole, we found that EC genes had lower average  
366 branch lengths than CDC genes ( $P=2.2e-16$ , Figure 3), suggesting that the Z7 CDC  
367 genes are evolving faster than the Z7 EC genes.

368

### 369 **HGT of genes in the CDC**

370 To examine whether any of the *A. alternata* Z7 CDC genes originated via HGT,  
371 we calculated the Alien Index (Gladyshev et al., 2008; Wisecaver et al., 2016) of all  
372 512 genes. A total of 43 genes show  $AI > 0$  and at least 80% of their top 200 BLASTp  
373 hits with a taxonomic classification other than Dothideomycetes. The validity of these  
374 43 HGT candidates was further examined phylogenetically. The phylogenetic trees for  
375 most of these 43 HGT candidates were weakly supported, but the evolutionary origin  
376 of 14 of these genes was strongly supported to be outside Dothideomycetes (Table 3,  
377 Fig S2-15). The AU test for each of the 14 genes significantly rejected the hypothesis  
378 that they formed a monophyletic group with the rest of the sequences from  
379 Dothideomycetes (Table 3). As the genes inferred to have undergone HGT are also  
380 found in other *Alternaria* species, we infer that the HGT events occurred before the  
381 divergence of the Z7 strain from the other *Alternaria* genomes examined and not



382 after. Specifically, 4 of the horizontally transferred genes are found in the genomes of  
383 species in *Alternaria* Clades I and II, 6 genes are also found in the genomes of species  
384 in *Alternaria* Clade I, and 4 genes are found only in the Japanese pear, strawberry and  
385 tangerine pathotypes (Table 3).

386

387 All HGT genes encode enzymes except for AALT\_g11770, which is a hexose  
388 transporter (Table 3). According to their predicted functions, these HGT candidates  
389 are involved in two biological processes: oxidation reduction and carbohydrate  
390 metabolism (Table 3). Interestingly, five of the transferred genes are physically  
391 clustered in the Z7 strain CDC and almost always appear on the gene phylogeny as  
392 sisters to sequences from either *Cryptococcus* (Basidiomycota) or *Penicillium*  
393 (Eurotiomycetes) fungi (Figure 4A, Fig S2-6). Specifically, both *Penicillium*  
394 *flavigenum* and *Cryptococcus gattii* have 4 clustered genes that are highly similar and  
395 group together on the gene phylogeny with 4 of these 5 genes (Figure 4A, B);  
396 *Penicillium flavigenum* lacks the neuraminidase encoding gene homolog  
397 (AALT\_g11771) while *Cryptococcus gattii* lacks the oxidoreductase encoding gene  
398 homolog (AALT\_g11772) (Fig 4B). However, the gene order and orientation is quite  
399 different among the clusters of these three genomes (Figure 4B). From these results,  
400 the most likely scenario is that the genes were horizontally transferred from  
401 *Cryptococcus* or *Penicillium* species and were subsequently rearranged.

402

403 The ACT toxin is essential for the pathogenicity of *A. alternata* Z7 to citrus  
404 leaves, the synthesis of which is predicted to be controlled by a cluster composed of  
405 about 25 genes (Wang et al., 2016). Surprisingly, 4 / 25 of the ACT cluster genes  
406 contained in the Z7 CDC strain are always grouped together with sequences from the  
407 unrelated *Colletotrichum* (Sordariomycetes) in their gene phylogenies (Figure 5A, Fig

408 S7-10). Interestingly, the orthologous genes in *Colletotrichum tofieldiae* are  
409 physically linked with each other and are part of a secondary metabolite biosynthetic  
410 gene cluster predicted by antiSMASH 4.0 (Blin et al., 2017) (Figure 5A, B), although  
411 the gene order and orientation of the two clusters is different (Figure 5B). Besides  
412 *A.alternata* Z7 (the tangerine pathotype), this cluster is also present in the Japanese  
413 pear pathotype and the strawberry pathotype (Wang et al., 2016). Previously, deletion  
414 of the AKT3 gene in the Japanese pear pathotype, which is the ortholog of the HMG-  
415 CoA hydrolase gene ACTT3 (AALT\_g11755), produced toxin-deficient and non-  
416 pathogenic mutants (Tanaka and Tsuge, 2000). Taken together, these results raise the  
417 hypothesis that the HGT of four genes from a lineage related to *Colletotrichum* may  
418 have contributed to the composition of the HST gene clusters found in the CDCs of  
419 three pathotypes of *Alternaria*.

420

421       There is only one gene (AALT\_g12037) that was likely transferred from bacteria  
422 (Figure 6A, Fig S11). The phylogenetic tree of this gene contains a large proportion of  
423 bacteria (Figure 6A). There are only 15 fungal species predicted to contain this gene,  
424 including 13 *Alternaria* species, *Fusarium oxysporum* and *Pyrenochaeta* sp.  
425 *DS3sAY3a* (Figure 6B). AALT\_g12037 is 1,428 bp in length and contains no introns.  
426 It encodes one of the carboxylesterases that are responsible for the hydrolysis of  
427 carboxylic acid esters into their corresponding acid and alcohol (Potter and Wadkins,  
428 2006). This protein in Z7 CDC shows high sequence identity (75%, 73% and 74%)  
429 and query coverage (99%, 100% and 98%) to its orthologs in *Fusarium oxysporum*,  
430 *Pyrenochaeta* sp. *DS3sAY3a* and *Bacillus subtilis*, one of the potential donors. To test  
431 the functional significance of this gene, the coding region of AALT\_g12037 was  
432 knocked out in *A.alternata* Z7 (Figure 7A, B). However, the virulence of both the  
433 wild-type and the mutant did not differ (Figure 7C), indicating that this horizontally

434 transferred carboxylesterase is not associated with pathogenicity in *A.alternata* Z7.

435

## 436 **Discussion**

437 Conditionally dispensable chromosomes (CDCs) are commonly found in fungal  
438 phytopathogens and play key roles in pathogenicity (Johnson et al., 2001; Hatta et al.,  
439 2002). However, despite their importance, our knowledge about the gene content and  
440 evolutionary origin of CDCs is very limited. In this study, we identified and  
441 characterized the 1.84 Mb CDC of the tangerine pathotype strain Z7 of *A. alternata*  
442 and examined the function and evolutionary history of its genes. Our results suggest  
443 that CDC genes in *Alternaria* are involved in processes associated with metabolism,  
444 that they are conserved within the genus *Alternaria* and are rapidly evolving, and that  
445 they sometimes originate via HGT. Below, we discuss our findings in the context of  
446 the genome content of *Alternaria* CDCs and the evolutionary origin of *Alternaria*  
447 CDC genes.

448

449 In this study, we functionally annotated the CDC of the tangerine pathotype strain  
450 Z7 of *A. alternata*. Although the Z7 CDC is much larger than the *A. arborescens*  
451 CDC, several Z7 CDC gene families are comparable to those present in the *A.*  
452 *arborescens* CDC, including CAZymes, SSCPs, kinases, transcription factors and  
453 transporters (Table S4) (Hu et al., 2012). This result suggests that there are some  
454 shared properties between CDCs from these two divergent species. Our analyses also  
455 identified differences between CDCs in *A. arborescens* and in *A. alternata* strain Z7.  
456 For example, the enrichment of “biosynthetic process” genes was discovered in the *A.*  
457 *arborescens* CDC but not in the *A. alternata* CDC (Hu et al., 2012). In addition, the *A.*  
458 *arborescens* CDC contains 10 SM clusters and harbors 36 polyketide and non-  
459 ribosomal peptide synthetase genes that might be responsible for the biosynthesis of

---

460 the backbone structures of several groups of secondary metabolites (Hu et al., 2012).  
461 However, in Z7 CDC, except for the host selective ACT-toxin gene cluster, no other  
462 gene cluster involved in the biosynthesis of secondary metabolites was identified.  
463 About 39.2% (201) of the 512 genes found in Z7 CDC were described as hypothetical  
464 proteins according to their BLAST hits in the NCBI nr database, indicating that the  
465 functions of a great number of Z7 CDC genes are not known (Table S4).

466

467 Evolutionary analysis showed that most of the Z7 CDC proteins are highly  
468 conserved within the genus *Alternaria* and likely originated in the *Alternaria* last  
469 common ancestor (Figure 2). These results contrast with those of a previous study  
470 suggesting that the *A. arborescens* CDC originated from an unknown species through  
471 HGT (Hu et al., 2012). The discrepancy is most likely due to the small amount of  
472 available data used in the previous study; specifically, *A. arborescens* protein-coding  
473 genes were compared to only two small databases respectively composed of either  
474 only *A. brassicicola* proteins or of three fungal species from other filamentous fungal  
475 genera (*Leptosphaeria maculans*, *Pyrenophora tritici-repentis*, and *Aspergillus*  
476 *oryzae*) (Hu et al., 2012). In contrast, the much larger number of *Alternaria* genomes  
477 examined in our study shows that the evolutionary history of most CDC genes is  
478 consistent with the species phylogeny and with vertical, not horizontal, transmission.

479

480 Comparison of the Z7 CDC proteins to those in the proteomes of other  
481 *Alternaria* species showed that CDCs in different species or even in the same  
482 pathotype can be very variable (Figure 2). This result is consistent with the fact that  
483 the length of CDCs in distinct pathotypes of *A. alternata* is very variable. For example,  
484 both the strawberry and the tomato pathotypes contain a ~1.0 Mb CDC (Ito et al.,  
485 2004; Hu et al., 2012); both the Japanese pear and the tangerine pathotypes contain a

---

486 1.9-2.0 Mb CDC (Miyamoto et al., 2008; Miyamoto et al., 2009); the apple pathotype  
487 contains a 1.1-1.8 Mb CDC (Harimoto et al., 2007); while the rough lemon pathotype  
488 contains a 1.2-1.5 Mb CDC (Masunaka et al., 2005). Although the mechanism  
489 underlying the formation of these diverse CDCs in *Alternaria* species is largely  
490 unknown, a recent population genomics study in *Zymoseptoria tritici* identified the  
491 precise breakpoint locations of insertions that give rise to the highly differentiated  
492 gene contents in *Z. tritici* CDCs (Croll et al., 2013). That same study also reported the  
493 occurrence of CDC losses in progeny because of nondisjunction during meiosis as  
494 well as the emergence of a new CDC through a fusion between sister chromatids  
495 (Croll et al., 2013). Thus, the CDCs of *Z. tritici* were proposed to originate mainly  
496 from ancient core chromosomes through a degeneration process involving breakage-  
497 fusion-bridge cycles and large insertions (Croll et al., 2013). Although determining  
498 whether the breakage-fusion-bridge cycles model holds for *Alternaria* CDCs will  
499 require further sequencing of CDCs and analyses, we note that our finding of  
500 evolutionary conservation of CDC genes within *Alternaria* is consistent with the *Z.*  
501 *tritici* model.

502

503       Horizontal transfer of CDCs between different strains of the same or closely  
504 related fungal species has been documented for *Fusarium oxysporum*, *Colletotrichum*  
505 *gloeosporioides*, as well as for some *Alternaria* species (He et al., 1998; Akamatsu et  
506 al., 2001; Akagi et al., 2009a; Ma et al., 2010). Horizontal transfer of entire CDCs  
507 may contribute not only to the introduction of CDCs in fungal populations but also to  
508 their subsequent spread and to their acquisition of virulence factors that are essential  
509 for pathogenicity. Since fungal CDCs are known to be able to transfer between  
510 closely related species, it may be very difficult to distinguish between vertical and  
511 horizontal transmission of CDCs within *Alternaria*. On the other hand, horizontal

---

512 transfer of CDCs between distantly related species has never been demonstrated,  
513 making it a less likely explanation for the evolutionary origin of *Alternaria* CDCs.

514

515       Although horizontal transfer is an unlikely explanation for the formation of  
516 CDCs in *Alternaria*, our study found evidence that HGT is a mechanism for the origin  
517 of some of the genes residing in its CDCs. Specifically, we found 14 genes in the Z7  
518 CDC that were likely horizontally transferred from distantly related species, including  
519 9 genes that formed 2 gene clusters (Table 3). Previously, the 23-gene secondary  
520 metabolic gene cluster involved in the biosynthesis of the mycotoxin sterigmatocystin  
521 was shown to have been horizontally transferred from *Aspergillus* to *Podospora* (Slot  
522 and Rokas, 2011). HGT of intact gene clusters would not only contribute to fungal  
523 metabolic diversity but also potentially provide its recipient with a competitive  
524 advantage offered by the ability to synthesize a novel secondary metabolite. Although  
525 the horizontally transferred gene cluster in this study contains fewer genes, the HMG-  
526 CoA hydrolase coding gene AKT3 found in one of the two Z7 CDC transferred  
527 clusters was shown to be absolutely required for the HST production and virulence to  
528 host plant (Tanaka and Tsuge, 2000). This is consistent with the view that HGT  
529 events, including ones involving the transfer of entire clusters, have played important  
530 roles over the course of the evolution of filamentous fungi (Fitzpatrick, 2012; Soanes  
531 and Richards, 2014; Wisecaver and Rokas, 2015).

532

533       One of the Z7 CDC genes, a carboxylesterase, was likely acquired from Bacteria  
534 (Figure 6A). Carboxylesterases are ubiquitous enzymes that exist in almost all living  
535 organisms and whose function is to hydrolyze carboxylesters into the corresponding  
536 carboxylic acid and alcohol (Sato and Hosokawa, 1998). By degrading exogenous  
537 xenobiotics that contain esters, carboxylesterases are thought to be associated with

538 detoxification (Hatfield et al., 2016), although, to date, no endogenous  
539 carboxylesterase substrates have been identified. Functional analysis of the  
540 horizontally transferred carboxylesterase showed that this gene is not associated with  
541 the pathogenicity of *A.alternata* Z7 (Figure 7C). Thus, the acquisition of this gene  
542 may not have been related to the transition to a pathogenic lifestyle but with nutrient  
543 utilization and survival in nutritionally adverse environments.

544

## 545 **References**

- 546 Akagi, Y., Akamatsu, H., Otani, H., and Kodama, M. (2009a). Horizontal chromosome transfer, a  
547 mechanism for the evolution and differentiation of a plant-pathogenic fungus. *Eukaryot Cell*  
548 8(11), 1732-1738.
- 549 Akagi, Y., Taga, M., Yamamoto, M., Tsuge, T., Fukumasa-Nakai, Y., Otani, H., et al. (2009b).  
550 Chromosome constitution of hybrid strains constructed by protoplast fusion between the  
551 tomato and strawberry pathotypes of *Alternaria alternata*. *Journal of General Plant Pathology*  
552 75(2), 101-109.
- 553 Akamatsu, H., Fukumasa-Nakai, Y., Otani, H., and Kodama, M. (2001). Construction and genetic  
554 analysis of hybrid strains between apple and tomato pathotypes of *Alternaria alternata* by  
555 protoplast fusion. *Journal of General Plant Pathology* 67(2), 97-105.
- 556 Alexa, A., and Rahnenfuhrer, J. 2016. topGO: Enrichment Analysis for Gene Ontology. (R package  
557 version 2.28.0).
- 558 Blin, K., Wolf, T., Chevrette, M.G., Lu, X., Schwalen, C.J., Kautsar, S.A., et al. (2017). antiSMASH  
559 4.0-improvements in chemistry prediction and gene cluster boundary identification. *Nucleic*  
560 *Acids Res* 28(10).
- 561 Capella-Gutierrez, S., Silla-Martinez, J.M., and Gabaldon, T. (2009). trimAl: a tool for automated  
562 alignment trimming in large-scale phylogenetic analyses. *Bioinformatics* 25(15), 1972-1973.
- 563 Chen, F., Mackey, A.J., Stoeckert, C.J., Jr., and Roos, D.S. (2006). OrthoMCL-DB: querying a  
564 comprehensive multi-species collection of ortholog groups. *Nucleic Acids Res* 34(Database  
565 issue), D363-368.
- 566 Chen, L.H., Lin, C.H., and Chung, K.R. (2013). A nonribosomal peptide synthetase mediates  
567 siderophore production and virulence in the citrus fungal pathogen *Alternaria alternata*. *Mol*

- 
- 568 *Plant Pathol* 14(5), 497-505.
- 569 Chen, L.H., Tsai, H.C., Yu, P.L., and Chung, K.R. (2017). A Major Facilitator Superfamily  
570 Transporter-Mediated Resistance to Oxidative Stress and Fungicides Requires Yap1, Skn7,  
571 and MAP Kinases in the Citrus Fungal Pathogen *Alternaria alternata*. *PLoS One* 12(1).
- 572 Coleman, J.J., Rounsley, S.D., Rodriguez-Carres, M., Kuo, A., Wasmann, C.C., Grimwood, J., et al.  
573 (2009). The genome of *Nectria haematococca*: contribution of supernumerary chromosomes to  
574 gene expansion. *PLoS Genet* 5(8), 28.
- 575 Covert, S.F. (1998). Supernumerary chromosomes in filamentous fungi. *Curr Genet* 33(5), 311-319.
- 576 Croll, D., Zala, M., and McDonald, B.A. (2013). Breakage-fusion-bridge cycles and large insertions  
577 contribute to the rapid evolution of accessory chromosomes in a fungal pathogen. *PLoS Genet*  
578 9(6), 13.
- 579 Dang, H.X., Pryor, B., Peever, T., and Lawrence, C.B. (2015). The *Alternaria* genomes database: a  
580 comprehensive resource for a fungal genus comprised of saprophytes, plant pathogens, and  
581 allergenic species. *BMC Genomics* 16(239), 015-1430.
- 582 Delcher, A.L., Salzberg, S.L., and Phillippy, A.M. (2003). Using MUMmer to identify similar regions  
583 in large sequence sets. *Curr Protoc Bioinformatics* 10(10).
- 584 Finn, R.D., Bateman, A., Clements, J., Coghill, P., Eberhardt, R.Y., Eddy, S.R., et al. (2014). Pfam: the  
585 protein families database. *Nucleic Acids Res* 42(Database issue), 27.
- 586 Fitzpatrick, D.A. (2012). Horizontal gene transfer in fungi. *FEMS Microbiol Lett* 329(1), 1-8.
- 587 Gladyshev, E.A., Meselson, M., and Arkipova, I.R. (2008). Massive horizontal gene transfer in  
588 bdelloid rotifers. *Science* 320(5880), 1210-1213.
- 589 Harimoto, Y., Hatta, R., Kodama, M., Yamamoto, M., Otani, H., and Tsuge, T. (2007). Expression  
590 profiles of genes encoded by the supernumerary chromosome controlling AM-toxin  
591 biosynthesis and pathogenicity in the apple pathotype of *Alternaria alternata*. *Mol Plant*  
592 *Microbe Interact* 20(12), 1463-1476.
- 593 Hatfield, M.J., Umans, R.A., Hyatt, J.L., Edwards, C.C., Wierdl, M., Tsurkan, L., et al. (2016).  
594 Carboxylesterases: General detoxifying enzymes. *Chem Biol Interact* 259(Pt B), 327-331.
- 595 Hatta, R., Ito, K., Hosaki, Y., Tanaka, T., Tanaka, A., Yamamoto, M., et al. (2002). A conditionally  
596 dispensable chromosome controls host-specific pathogenicity in the fungal plant pathogen  
597 *Alternaria alternata*. *Genetics* 161(1), 59-70.
- 598 He, C., Rusu, A.G., Poplawski, A.M., Irwin, J.A., and Manners, J.M. (1998). Transfer of a  
599 supernumerary chromosome between vegetatively incompatible biotypes of the fungus



- 
- 600 Colletotrichum gloeosporioides. *Genetics* 150(4), 1459-1466.
- 601 Hu, J., Chen, C., Peever, T., Dang, H., Lawrence, C., and Mitchell, T. (2012). Genomic  
602 characterization of the conditionally dispensable chromosome in *Alternaria arborescens*  
603 provides evidence for horizontal gene transfer. *BMC Genomics* 13(171), 1471-2164.
- 604 Ito, K., Tanaka, T., Hatta, R., Yamamoto, M., Akimitsu, K., and Tsuge, T. (2004). Dissection of the  
605 host range of the fungal plant pathogen *Alternaria alternata* by modification of secondary  
606 metabolism. *Molecular Microbiology* 52(2), 399-411.
- 607 Johnson, L.J., Johnson, R.D., Akamatsu, H., Salamiah, A., Otani, H., Kohmoto, K., et al. (2001).  
608 Spontaneous loss of a conditionally dispensable chromosome from the *Alternaria alternata*  
609 apple pathotype leads to loss of toxin production and pathogenicity. *Curr Genet* 40(1), 65-72.
- 610 Kalyaanamoorthy, S., Minh, B.Q., Wong, T.K.F., von Haeseler, A., and Jermini, L.S. (2017).  
611 ModelFinder: fast model selection for accurate phylogenetic estimates. *Nat Methods* 14(6),  
612 587-589.
- 613 Khaldi, N., Seifuddin, F.T., Turner, G., Haft, D., Nierman, W.C., Wolfe, K.H., et al. (2010). SMURF:  
614 Genomic mapping of fungal secondary metabolite clusters. *Fungal Genet Biol* 47(9), 736-741.
- 615 Klee, E.W., and Ellis, L.B. (2005). Evaluating eukaryotic secreted protein prediction. *BMC*  
616 *Bioinformatics* 6, 256.
- 617 Kosti, I., Mandel-Gutfreund, Y., Glaser, F., and Horwitz, B.A. (2010). Comparative analysis of fungal  
618 protein kinases and associated domains. *BMC Genomics* 11(133), 1471-2164.
- 619 Letunic, I., and Bork, P. (2016). Interactive tree of life (iTOL) v3: an online tool for the display and  
620 annotation of phylogenetic and other trees. *Nucleic Acids Res* 44(W1), 19.
- 621 Lin, C.H., Yang, S.L., and Chung, K.R. (2009). The YAP1 homolog-mediated oxidative stress  
622 tolerance is crucial for pathogenicity of the necrotrophic fungus *Alternaria alternata* in citrus.  
623 *Mol Plant Microbe Interact* 22(8), 942-952.
- 624 Lombard, V., Golaconda Ramulu, H., Drula, E., Coutinho, P.M., and Henrissat, B. (2014). The  
625 carbohydrate-active enzymes database (CAZy) in 2013. *Nucleic Acids Res* 42(Database issue),  
626 21.
- 627 Ma, L.J., van der Does, H.C., Borkovich, K.A., Coleman, J.J., Daboussi, M.J., Di Pietro, A., et al.  
628 (2010). Comparative genomics reveals mobile pathogenicity chromosomes in *Fusarium*.  
629 *Nature* 464(7287), 367-373.
- 630 Masunaka, A., Ohtani, K., Peever, T.L., Timmer, L.W., Tsuge, T., Yamamoto, M., et al. (2005). An  
631 Isolate of *Alternaria alternata* That Is Pathogenic to Both Tangerines and Rough Lemon and

- 
- 632 Produces Two Host-Selective Toxins, ACT- and ACR-Toxins. *Phytopathology* 95(3), 241-  
633 247.
- 634 Miyamoto, Y., Ishii, Y., Honda, A., Masunaka, A., Tsuge, T., Yamamoto, M., et al. (2009). Function of  
635 genes encoding acyl-CoA synthetase and enoyl-CoA hydratase for host-selective ACT-toxin  
636 biosynthesis in the tangerine pathotype of *Alternaria alternata*. *Phytopathology* 99(4), 369-  
637 377.
- 638 Miyamoto, Y., Masunaka, A., Tsuge, T., Yamamoto, M., Ohtani, K., Fukumoto, T., et al. (2008).  
639 Functional analysis of a multicopy host-selective ACT-toxin biosynthesis gene in the  
640 tangerine pathotype of *Alternaria alternata* using RNA silencing. *Mol Plant Microbe Interact*  
641 21(12), 1591-1599.
- 642 Miyamoto, Y., Masunaka, A., Tsuge, T., Yamamoto, M., Ohtani, K., Fukumoto, T., et al. (2010).  
643 ACTTS3 encoding a polyketide synthase is essential for the biosynthesis of ACT-toxin and  
644 pathogenicity in the tangerine pathotype of *Alternaria alternata*. *Mol Plant Microbe Interact*  
645 23(4), 406-414.
- 646 Moktali, V., Park, J., Fedorova-Abrams, N.D., Park, B., Choi, J., Lee, Y.-H., et al. (2012). Systematic  
647 and searchable classification of cytochrome P450 proteins encoded by fungal and oomycete  
648 genomes. *BMC Genomics* 13(525), 1471-2164.
- 649 Nguyen, L.-T., Schmidt, H.A., von Haeseler, A., and Minh, B.Q. (2015). IQ-TREE: a fast and effective  
650 stochastic algorithm for estimating maximum-likelihood phylogenies. *Mol Biol Evol* 32(1),  
651 268-274.
- 652 Petersen, T.N., Brunak, S., von Heijne, G., and Nielsen, H. (2011). SignalP 4.0: discriminating signal  
653 peptides from transmembrane regions. *Nat Methods* 8(10), 785-786. doi: doi:  
654 10.1038/nmeth.1701.
- 655 Poisson, G., Chauve, C., Chen, X., and Bergeron, A. (2007). FragAnchor: a large-scale predictor of  
656 glycosylphosphatidylinositol anchors in eukaryote protein sequences by qualitative scoring.  
657 *Genomics Proteomics Bioinformatics* 5(2), 121-130.
- 658 Potter, P.M., and Wadkins, R.M. (2006). Carboxylesterases--detoxifying enzymes and targets for drug  
659 therapy. *Curr Med Chem* 13(9), 1045-1054.
- 660 Saier, M.H., Jr., Reddy, V.S., Tsu, B.V., Ahmed, M.S., Li, C., and Moreno-Hagelsieb, G. (2016). The  
661 Transporter Classification Database (TCDB): recent advances. *Nucleic Acids Res* 44(D1), 5.
- 662 Satoh, T., and Hosokawa, M. (1998). The mammalian carboxylesterases: from molecules to functions.  
663 *Annu Rev Pharmacol Toxicol* 38, 257-288.

- 
- 664 Shen, X.-X., Zhou, X., Kominek, J., Kurtzman, C.P., Hittinger, C.T., and Rokas, A. (2016).  
665 Reconstructing the Backbone of the Saccharomycotina Yeast Phylogeny Using Genome-Scale  
666 Data. *G3* 6(12), 3927-3939.
- 667 Shimodaira, H. (2002). An approximately unbiased test of phylogenetic tree selection. *Syst Biol* 51(3),  
668 492-508.
- 669 Shimodaira, H., and Hasegawa, M. (2001). CONSEL: for assessing the confidence of phylogenetic tree  
670 selection. *Bioinformatics* 17(12), 1246-1247.
- 671 Simao, F.A., Waterhouse, R.M., Ioannidis, P., Kriventseva, E.V., and Zdobnov, E.M. (2015). BUSCO:  
672 assessing genome assembly and annotation completeness with single-copy orthologs.  
673 *Bioinformatics* 31(19), 3210-3212.
- 674 Slot, J.C., and Rokas, A. (2011). Horizontal transfer of a large and highly toxic secondary metabolic  
675 gene cluster between fungi. *Curr Biol* 21(2), 134-139.
- 676 Soanes, D., and Richards, T.A. (2014). Horizontal gene transfer in eukaryotic plant pathogens. *Annu*  
677 *Rev Phytopathol* 52, 583-614.
- 678 Stanke, M., and Waack, S. (2003). Gene prediction with a hidden Markov model and a new intron  
679 submodel. *Bioinformatics* 19(2), ii215-225.
- 680 Stukenbrock, E.H., Jorgensen, F.G., Zala, M., Hansen, T.T., McDonald, B.A., and Schierup, M.H.  
681 (2010). Whole-genome and chromosome evolution associated with host adaptation and  
682 speciation of the wheat pathogen *Mycosphaerella graminicola*. *PLoS Genet* 6(12), e1001189.
- 683 Tanaka, A., and Tsuge, T. (2000). Structural and functional complexity of the genomic region  
684 controlling AK-toxin biosynthesis and pathogenicity in the Japanese pear pathotype of  
685 *Alternaria alternata*. *Molecular Plant-Microbe Interactions* 13(9), 975-986.
- 686 Thomma, B.P. (2003). *Alternaria* spp.: from general saprophyte to specific parasite. *Mol Plant Pathol*  
687 4(4), 225-236.
- 688 Tsuge, T., Harimoto, Y., Akimitsu, K., Ohtani, K., Kodama, M., Akagi, Y., et al. (2013). Host-selective  
689 toxins produced by the plant pathogenic fungus *Alternaria alternata*. *FEMS Microbiology*  
690 *Reviews* 37(1), 44-66.
- 691 Tsuge, T., Harimoto, Y., Hanada, K., Akagi, Y., Kodama, M., Akimitsu, K., et al. (2016). Evolution of  
692 pathogenicity controlled by small, dispensable chromosomes in *Alternaria alternata*  
693 pathogens. *Physiological and Molecular Plant Pathology* 95, 27-31.
- 694 Wang, M., Sun, X., Yu, D., Xu, J., Chung, K., and Li, H. (2016). Genomic and transcriptomic analyses  
695 of the tangerine pathotype of *Alternaria alternata* in response to oxidative stress. *Sci Rep*

---

696           6(32437).

697   Wisecaver, J.H., Alexander, W.G., King, S.B., Hittinger, C.T., and Rokas, A. (2016). Dynamic  
698           Evolution of Nitric Oxide Detoxifying Flavohemoglobins, a Family of Single-Protein  
699           Metabolic Modules in Bacteria and Eukaryotes. *Mol Biol Evol* 33(8), 1979-1987.

700   Wisecaver, J.H., and Rokas, A. (2015). Fungal metabolic gene clusters-caravans traveling across  
701           genomes and environments. *Front Microbiol* 6(161).

702   Yamada, K.D., Tomii, K., and Katoh, K. (2016). Application of the MAFFT sequence alignment  
703           program to large data-reexamination of the usefulness of chained guide trees. *Bioinformatics*  
704           32(21), 3246-3251.

705   Yang, S.L., Yu, P.L., and Chung, K.R. (2016). The glutathione peroxidase-mediated reactive oxygen  
706           species resistance, fungicide sensitivity and cell wall construction in the citrus fungal  
707           pathogen *Alternaria alternata*. *Environ Microbiol* 18(3), 923-935.

708

709

---

710 **Acknowledgements**

711 We thank members of the Rokas lab for helpful discussions. We thank Abigail  
712 Leavitt Labella and Jacob Steenwyk for their critical comments on this paper. This  
713 work was conducted in part using the resources of the Advanced Computing Center  
714 for Research and Education (ACCRE) at Vanderbilt University.

715

716 **Author contributions**

717 HL and AR supervised the work; MW, XS, NP, and JX conducted the analyses;  
718 HF and RR performed the experiment; MW drafted the initial version; and all  
719 authors contributed to the writing of the manuscript.

720

721 **Funding**

722 This work was supported by the National Foundation of Natural Science of China  
723 (31571948), the earmarked fund for China Agriculture Research System (CARS-27),  
724 the China Postdoctoral Science Foundation (2016M601945), and the US National  
725 Science Foundation (DEB-1442113 to AR).

726

727 **Competing financial interests**

728 The authors declare no competing financial interests.

729

---

730 **Legends for Figures**

731 **FIGURE 1** GO enrichment analysis of the Z7 CDC genes in the category “Biological  
732 Process”. Significantly enriched GO terms ( $p < 0.05$ ) are illustrated by rectangles.  
733 Rectangle color corresponds to degree of statistical significance and ranges from  
734 bright yellow (least significant) to dark red (most significant). For each node, the GO  
735 identifier, the GO term name, and p-value of each functional category is shown. The  
736 final line inside each node shows the number of genes that belong to the functional  
737 category in the CDC and in the whole genome of *A. alternata* Z7, respectively.

738

739 **FIGURE 2** Sequence conservation of Z7 CDC genes across the phylogeny of  
740 *Alternaria* and representative species of Dothideomycetes. The phylogeny on the left  
741 depicts the evolutionary relationships of species of *Alternaria* and representative  
742 Dothideomycetes. The maximum likelihood phylogeny was inferred from the  
743 concatenation-based analysis of an amino acid data matrix comprised from 1,754  
744 single-copy BUSCO genes under the LG+R10 substitution model. Branches with  
745 bootstrap support values of 100% are not shown; branches with bootstrap values  
746 <100% are shown near each branch. The heat map on the right was constructed using  
747 the sequence conservation value (BLAST identity \* query coverage) of each Z7 CDC  
748 protein to its best counterpart in each of the species included in this analysis. Cells  
749 with red color correspond to proteins (in specific species) that exhibit high sequence  
750 conservation to a given Z7 CDC protein. The numbers next to each species' name  
751 correspond to the number of proteins that exhibit sequence conservation values  
752 greater or equal to 0.5 when compared to Z7 CDC proteins.

753

754 **FIGURE 3** Distribution of the average branch length from all individual Z7 CDC  
755 (red line) or EC (blue line) gene trees constructed from groups of orthologous genes

756 within *Alternaria* Clade I. The dashed lines denote the mean values of the two  
757 distributions.

758

759 **FIGURE 4** Horizontal transfer of a cluster of 5 genes in the tangerine pathotype of  
760 *A.alternata* Z7 CDC. A) Phylogenetic evidence of the HGT of these genes. For each  
761 gene, the maximum likelihood phylogeny was inferred under the best substitution  
762 model automatically selected by ModelFinder, as implemented in IQ-TREE 1.5.4.  
763 Branch colors indicate the taxonomic lineages to which the different taxa included in  
764 each phylogeny belong. The red asterisk indicates the *Alternaria* clade on each  
765 phylogeny. The full phylogenetic trees of the individual genes can be found in Figs.  
766 S2 - S6. B) Conservation of synteny among the cluster of 5 genes in *A. alternata* and  
767 the evolutionary related clusters present in *Penicillium flavigenum* and *Cryptococcus*  
768 *gatti*. Orthologs among different species are marked with same color and homologous  
769 regions are shown by the gray boxes. Arrows indicate gene direction.

770

771 **FIGURE 5** Horizontal transfer of 4 genes in the ACT toxin gene cluster in the  
772 tangerine pathotype of *A.alternata* Z7 CDC. A) Phylogenetic evidence of the HGT of  
773 these genes. For each gene, the maximum likelihood phylogeny was inferred under  
774 the best substitution model automatically selected by ModelFinder, as implemented in  
775 IQ-TREE 1.5.4. Branch colors indicate the taxonomic lineages to which the different  
776 taxa included in each phylogeny belong. The red asterisk indicates the *Alternaria*  
777 clade on each phylogeny. The full phylogenetic trees of the individual genes can be  
778 found in Figs. S7 - S10. B) Conservation of synteny among the ACT toxin gene  
779 cluster in *A.alternata* Z7 and a predicted secondary metabolic gene cluster in  
780 *Colletotrichum tofieldiae* 0861. Orthologs among different species are marked with  
781 same color and homologous regions are shown by the gray boxes. Arrows indicate

782 gene direction.

783

784 **FIGURE 6** The gene AALT\_g12037 was horizontally transferred from Bacteria to  
785 the *A. alternata* Z7 CDC. A) ML phylogeny of AALT\_g12037 homologs across the  
786 tree of life. The gene's maximum likelihood phylogeny was inferred under the best  
787 substitution model automatically selected by ModelFinder, as implemented in IQ-  
788 TREE 1.5.4. Branch colors indicate the taxonomic lineages to which the different taxa  
789 included in each phylogeny belong. The red asterisk indicates the *Alternaria* clade on  
790 each phylogeny. The full tree can be found in Fig. S11. B) The presence of the HGT-  
791 acquired gene family in other *Alternaria* genomes. Light grey indicates the lack of  
792 this HGT gene in the corresponding species.

793

794 **FIGURE 7** Functional analysis of the role of the horizontally transferred CDC gene  
795 AALT\_g12037 in pathogenicity. A) Schematic depiction of gene disruption within  
796 AALT\_g12037 via a homologous integration. Numbers denote primers listed in  
797 supplementary table S3. B) PCR verification of the deletion of AALT\_g12037 gene.  
798 Long bands can be only amplified in the mutants (KO) using the outside PCR  
799 primer pairs 7/8 and 9/10 while the short band can be only amplified in the wildtype  
800 (WT) using the inner PCR primer pair 11/12. C) Virulence of the wild-type Z7 and  
801 the AALT\_g12037 gene mutant to citrus leaves.



---

## Legends for supplementary Figures

Fig. S1. Bar plot of the degree of sequence conservation of Z7 CDC proteins to the proteomes of other species in the Dothideomycetes. The sequence conservation value of each Z7 CDC protein to its best counterpart in each of the species was calculated by BLAST identity \* query coverage.

Figs. S2 – S15. Full ML phylogenetic trees of HGT gene homologs across the tree of life. Each gene's maximum likelihood phylogeny was inferred under the best substitution model automatically selected by ModelFinder, as implemented in IQ-TREE 1.5.4. Branch colors indicate the taxonomic lineages to which the different taxa included in each phylogeny belong. The *A. alternata* Z7 CDC sequence that was used as a query in the BLAST search is shown in red font. Bootstrap values are shown near each branch. Fig. S2: AALT\_g11769; Fig. S3: AALT\_g11770; Fig. S4: AALT\_g11771; Fig. S5: AALT\_g11772; Fig. S6: AALT\_g11773; Fig. S7: AALT\_g12032; Fig. S8: AALT\_g11755; Fig. S9: AALT\_g11757; Fig. S10: AALT\_g11758; Fig. S11: AALT\_g12037; Fig. S12: AALT\_g11567; Fig. S13: AALT\_g11777; Fig. S14: AALT\_g11781; Fig. S15: AALT\_g11892.

Table 1. General features of the essential chromosomes (EC) and conditionally dispensable chromosome (CDC) in *A. alternata* strain Z7

| Features                               | <i>A. alternata</i> EC | <i>A. alternata</i> CDC |
|----------------------------------------|------------------------|-------------------------|
| Genome size (Mb)                       | 32.53                  | 1.84                    |
| Number of contigs                      | 115                    | 41                      |
| GC content (%)                         | 51.2                   | 47.7                    |
| Protein-coding genes                   | 11536                  | 512                     |
| Gene density (number of genes per Mb)  | 355                    | 279                     |
| Mean gene length (bp)                  | 1736                   | 1516                    |
| Mean number of exons per gene          | 2.8                    | 2.5                     |
| Mean length of exons                   | 559                    | 531                     |
| Mean number of introns per gene        | 1.8                    | 1.5                     |
| Mean length of introns                 | 92                     | 121                     |
| Percentage of genes without intron (%) | 24                     | 32                      |
| Repeat rate (%)                        | 0.51                   | 1.23                    |
| tRNA genes                             | 115                    | 0                       |

Table 2 Annotation of the differentially expressed genes located in the conditionally dispensable chromosome with absolute log<sub>2</sub>FC >2 during H<sub>2</sub>O<sub>2</sub> stress

| gene id     | log <sub>2</sub> FC | padj     | Pfam                               | domain                                                                                                                   | Description                                         |
|-------------|---------------------|----------|------------------------------------|--------------------------------------------------------------------------------------------------------------------------|-----------------------------------------------------|
| AALT_g11773 | 4.3712              | 1.09E-07 |                                    |                                                                                                                          | oxidoreductase                                      |
| AALT_g11774 | 4.2924              | 4.21E-08 | PF05368                            | NmrA-like family                                                                                                         | nucleoside-diphosphate-sugar epimerase family       |
| AALT_g11717 | 3.9966              | 9.78E-05 |                                    |                                                                                                                          | hypothetical protein                                |
| AALT_g11883 | 3.5338              | 7.90E-04 |                                    |                                                                                                                          | hypothetical protein                                |
| AALT_g11772 | 3.4436              | 3.14E-05 | PF01408                            | Oxidoreductase family, NAD-binding Rossmann fold                                                                         | myo-inositol 2-dehydrogenase                        |
| AALT_g11775 | 3.4189              | 4.31E-09 |                                    |                                                                                                                          | hypothetical protein                                |
| AALT_g11750 | 3.3427              | 4.95E-10 | PF14765, PF00698, PF08659          | Polyketide synthase dehydratase, Acyl transferase domain, Phosphopantetheine, attachment site, Methyltransferase domain, | polyketide synthase                                 |
| AALT_g11216 | 3.2515              | 9.34E-09 |                                    |                                                                                                                          | hypothetical protein                                |
| AALT_g11903 | 3.2159              | 1.51E-33 | PF12697                            | Abhydrolase_6                                                                                                            | alpha beta hydrolase                                |
| AALT_g11194 | 3.2043              | 1.67E-26 | PF01425                            | Amidase                                                                                                                  | glutamyl-tRNA(Gln) amidotransferase subunit A       |
| AALT_g11797 | 3.1694              | 3.79E-35 | PF05199, PF00732                   | GMC oxidoreductase                                                                                                       | glucose oxidase                                     |
| AALT_g11943 | 2.6733              | 1.63E-04 |                                    |                                                                                                                          | hypothetical protein                                |
| AALT_g11172 | 2.5340              | 1.50E-11 | PF00797                            | N-acetyltransferase                                                                                                      | Arylamine N-acetyltransferase                       |
| AALT_g11565 | 2.4221              | 7.76E-11 | PF06331                            | Transcription factor TFIIF complex subunit Tfb5                                                                          | RNA polymerase II transcription factor B subunit 5  |
| AALT_g11916 | 2.3833              | 1.03E-07 | PF12311                            | Protein of unknown function                                                                                              | hypothetical protein                                |
| AALT_g11577 | 2.2458              | 4.84E-11 | PF02586                            | SOS response associated peptidase                                                                                        | putative duf159 domain protein                      |
| AALT_g11978 | 2.1658              | 4.45E-04 | PF00651                            | BTB/POZ domain                                                                                                           | hypothetical protein                                |
| AALT_g11054 | -2.0725             | 3.00E-03 | PF03184, PF03221, PF05225          | DDE superfamily endonuclease, Tc5 transposase DNA-binding domain, helix-turn-helix, Psq domain                           | putative transposase                                |
| AALT_g11894 | -2.0867             | 5.54E-05 | PF00175, PF00667, PF00258, PF00067 | Oxidoreductase NAD-binding domain, FAD binding domain, Flavodoxin, Cytochrome P450                                       | bifunctional P-450/NADPH-P450 reductase             |
| AALT_g11037 | -2.2114             | 1.68E-04 |                                    |                                                                                                                          | hypothetical protein                                |
| AALT_g11895 | -2.8403             | 2.37E-05 | PF00487                            | Fatty acid desaturase                                                                                                    | omega-6 fatty acid desaturase (delta-12 desaturase) |

1 Table 3 Summary list of all horizontal gene transfers (HGTs) in *A.alternata* Z7 CDC.

| Gene ID     | Protein length | Closest sequence | Closest species                        | Proteome Identity | Gene Identity | Description                              | Distribution in <i>Alternaria</i> | AU test <i>P</i> value |
|-------------|----------------|------------------|----------------------------------------|-------------------|---------------|------------------------------------------|-----------------------------------|------------------------|
| AALT_g11567 | 667            | EGU73680.1       | <i>Fusarium oxysporum</i>              | 50                | 90            | alcohol oxidase                          | Clade I, II                       | 2E-08                  |
| AALT_g11755 | 296            | KZL71655.1       | <i>Colletotrichum tofieldiae</i>       | 51                | 64            | HMG-CoA hydrolase                        | 3 pathotypes                      | 2E-50                  |
| AALT_g11757 | 2349           | OLN84341.1       | <i>Colletotrichum chlorophyti</i>      | 50                | 59            | polyketide synthase                      | 3 pathotypes                      | 3E-52                  |
| AALT_g11758 | 439            | OLN84339.1       | <i>Colletotrichum chlorophyti</i>      | 50                | 74            | Cytochrome P450, Aft11-1                 | 3 pathotypes                      | 2E-56                  |
| AALT_g11769 | 320            | OQE18800.1       | <i>Penicillium flavigenum</i>          | 51                | 71            | short chain dehydrogenase                | Clade I                           | 2E-40                  |
| AALT_g11770 | 554            | OQE18785.1       | <i>Penicillium flavigenum</i>          | 51                | 89            | hexose transporter                       | Clade I                           | 2E-44                  |
| AALT_g11771 | 396            | ADV23792         | <i>Cryptococcus gattii</i>             | 41                | 83            | neuraminidase                            | Clade I                           | 2E-06                  |
| AALT_g11772 | 377            | OQE18924.1       | <i>Penicillium flavigenum</i>          | 51                | 89            | NAD(P)-binding oxidoreductase            | Clade I                           | 3E-76                  |
| AALT_g11773 | 332            | OQE18776.1       | <i>Penicillium flavigenum</i>          | 51                | 87            | gfo/Idh/MocA family oxidoreductase       | Clade I                           | /                      |
| AALT_g11777 | 646            | KFY76151.1       | <i>Pseudogymnoascus sp. VKM F-103</i>  | 52                | 78            | flavin-containing monooxygenase          | Clade I, II                       | 1E-06                  |
| AALT_g11781 | 362            | KFZ02874.1       | <i>Pseudogymnoascus sp. VKM F-4520</i> | 49                | 80            | NAD-binding Rossmann fold oxidoreductase | Clade I, II                       | 3E-04                  |
| AALT_g11892 | 377            | GAM40406.1       | <i>Talaromyces cellulolyticus</i>      | 52                | 54            | isopropanol dehydrogenase                | Clade I                           | 1E-06                  |
| AALT_g12032 | 349            | KZL71680.1       | <i>Colletotrichum tofieldiae</i>       | 51                | 72            | Acyl-CoA dehydrogenase, Aft10-1          | 3 pathotypes                      | 3E-73                  |
| AALT_g12037 | 430            | EWZ28488.1       | <i>Fusarium oxysporum</i>              | 50                | 73            | carboxylesterase                         | Clade I, II                       | /                      |

2 3 pathotypes: the Japanese pear, strawberry and tangerine pathotypes.

3

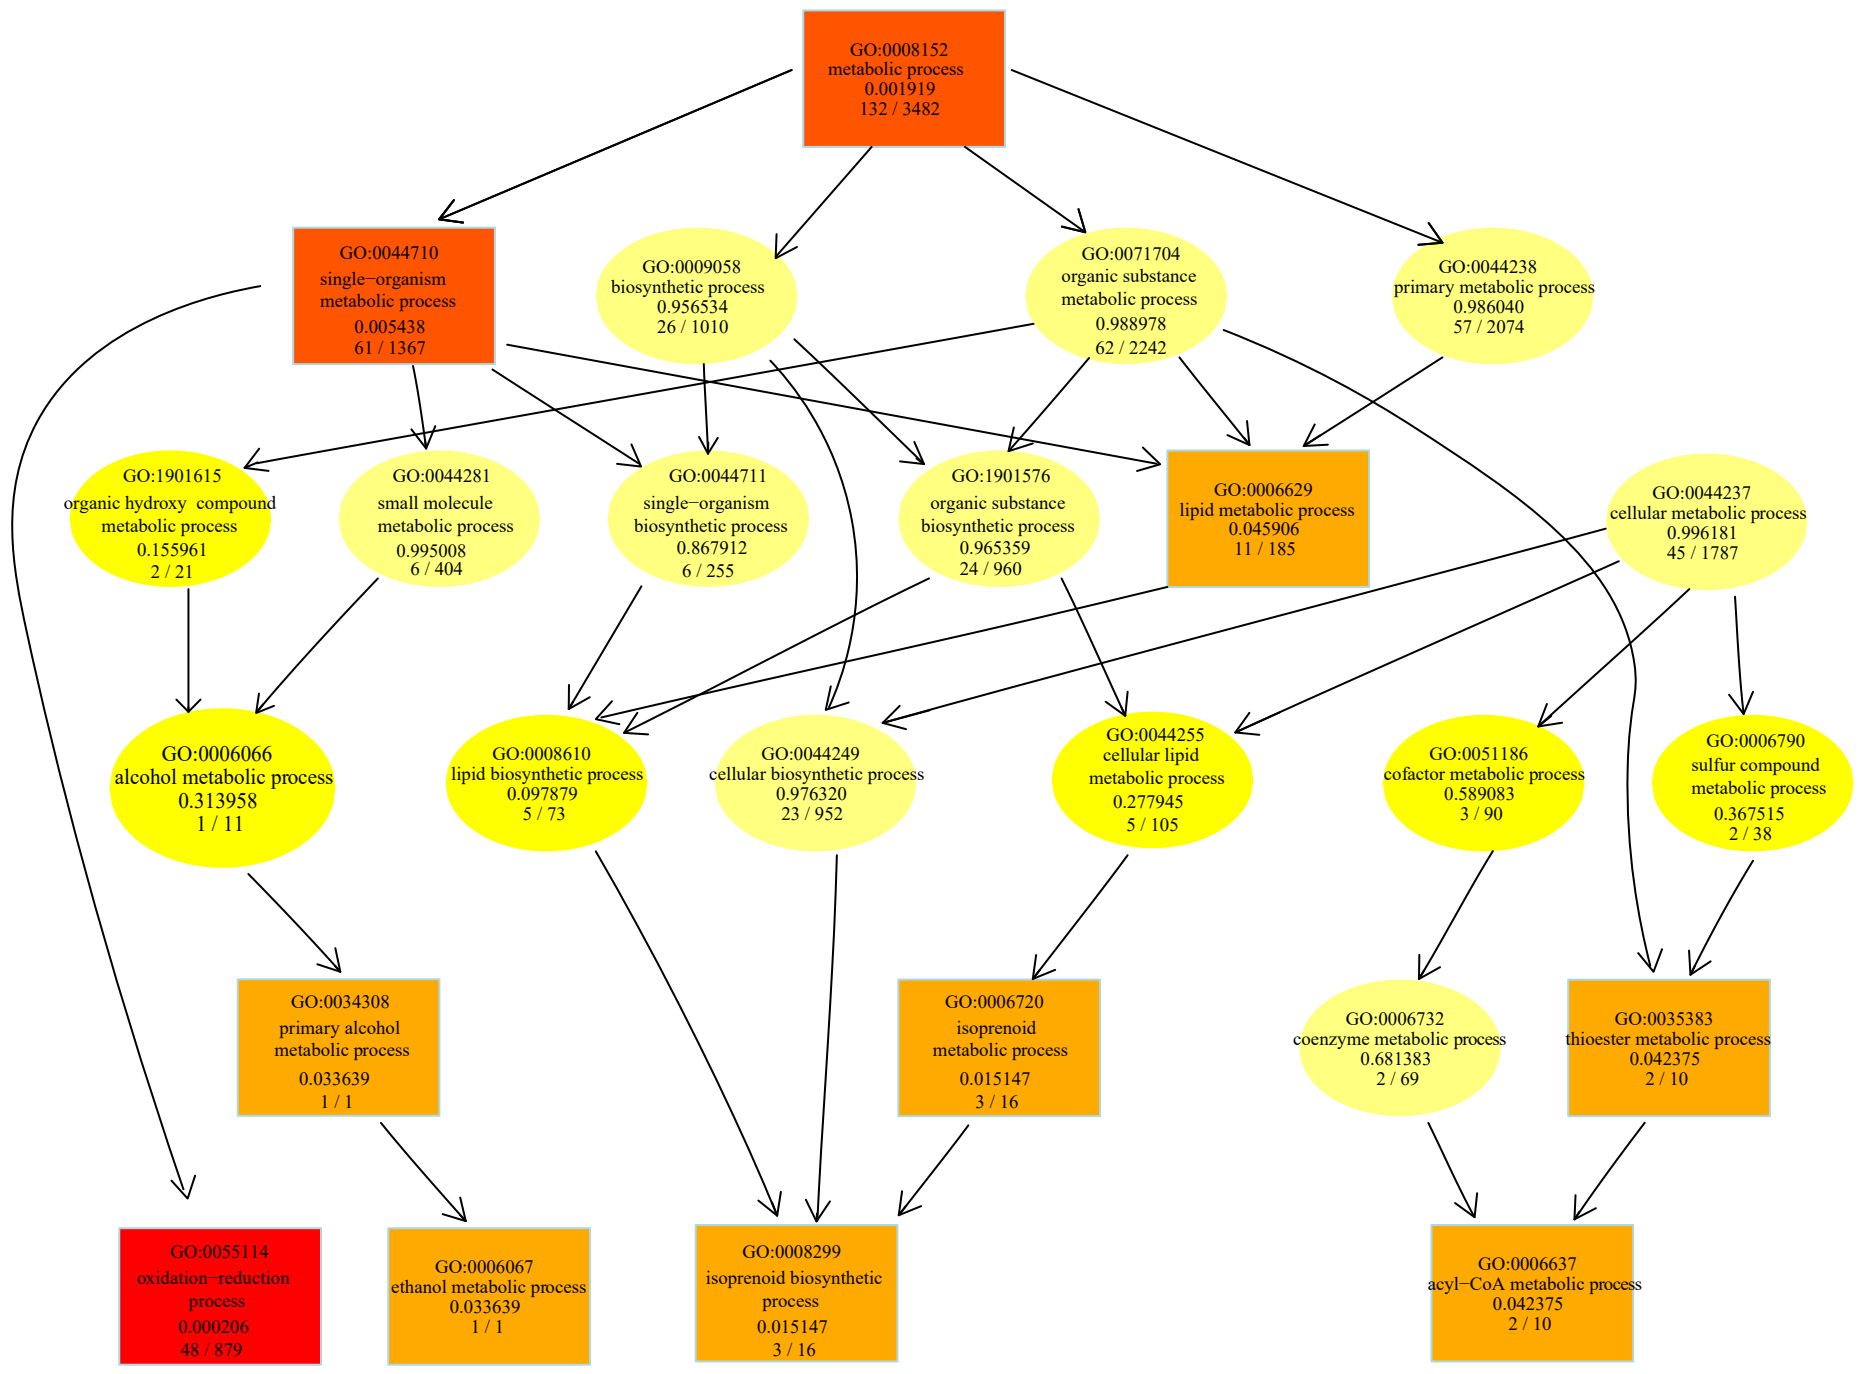

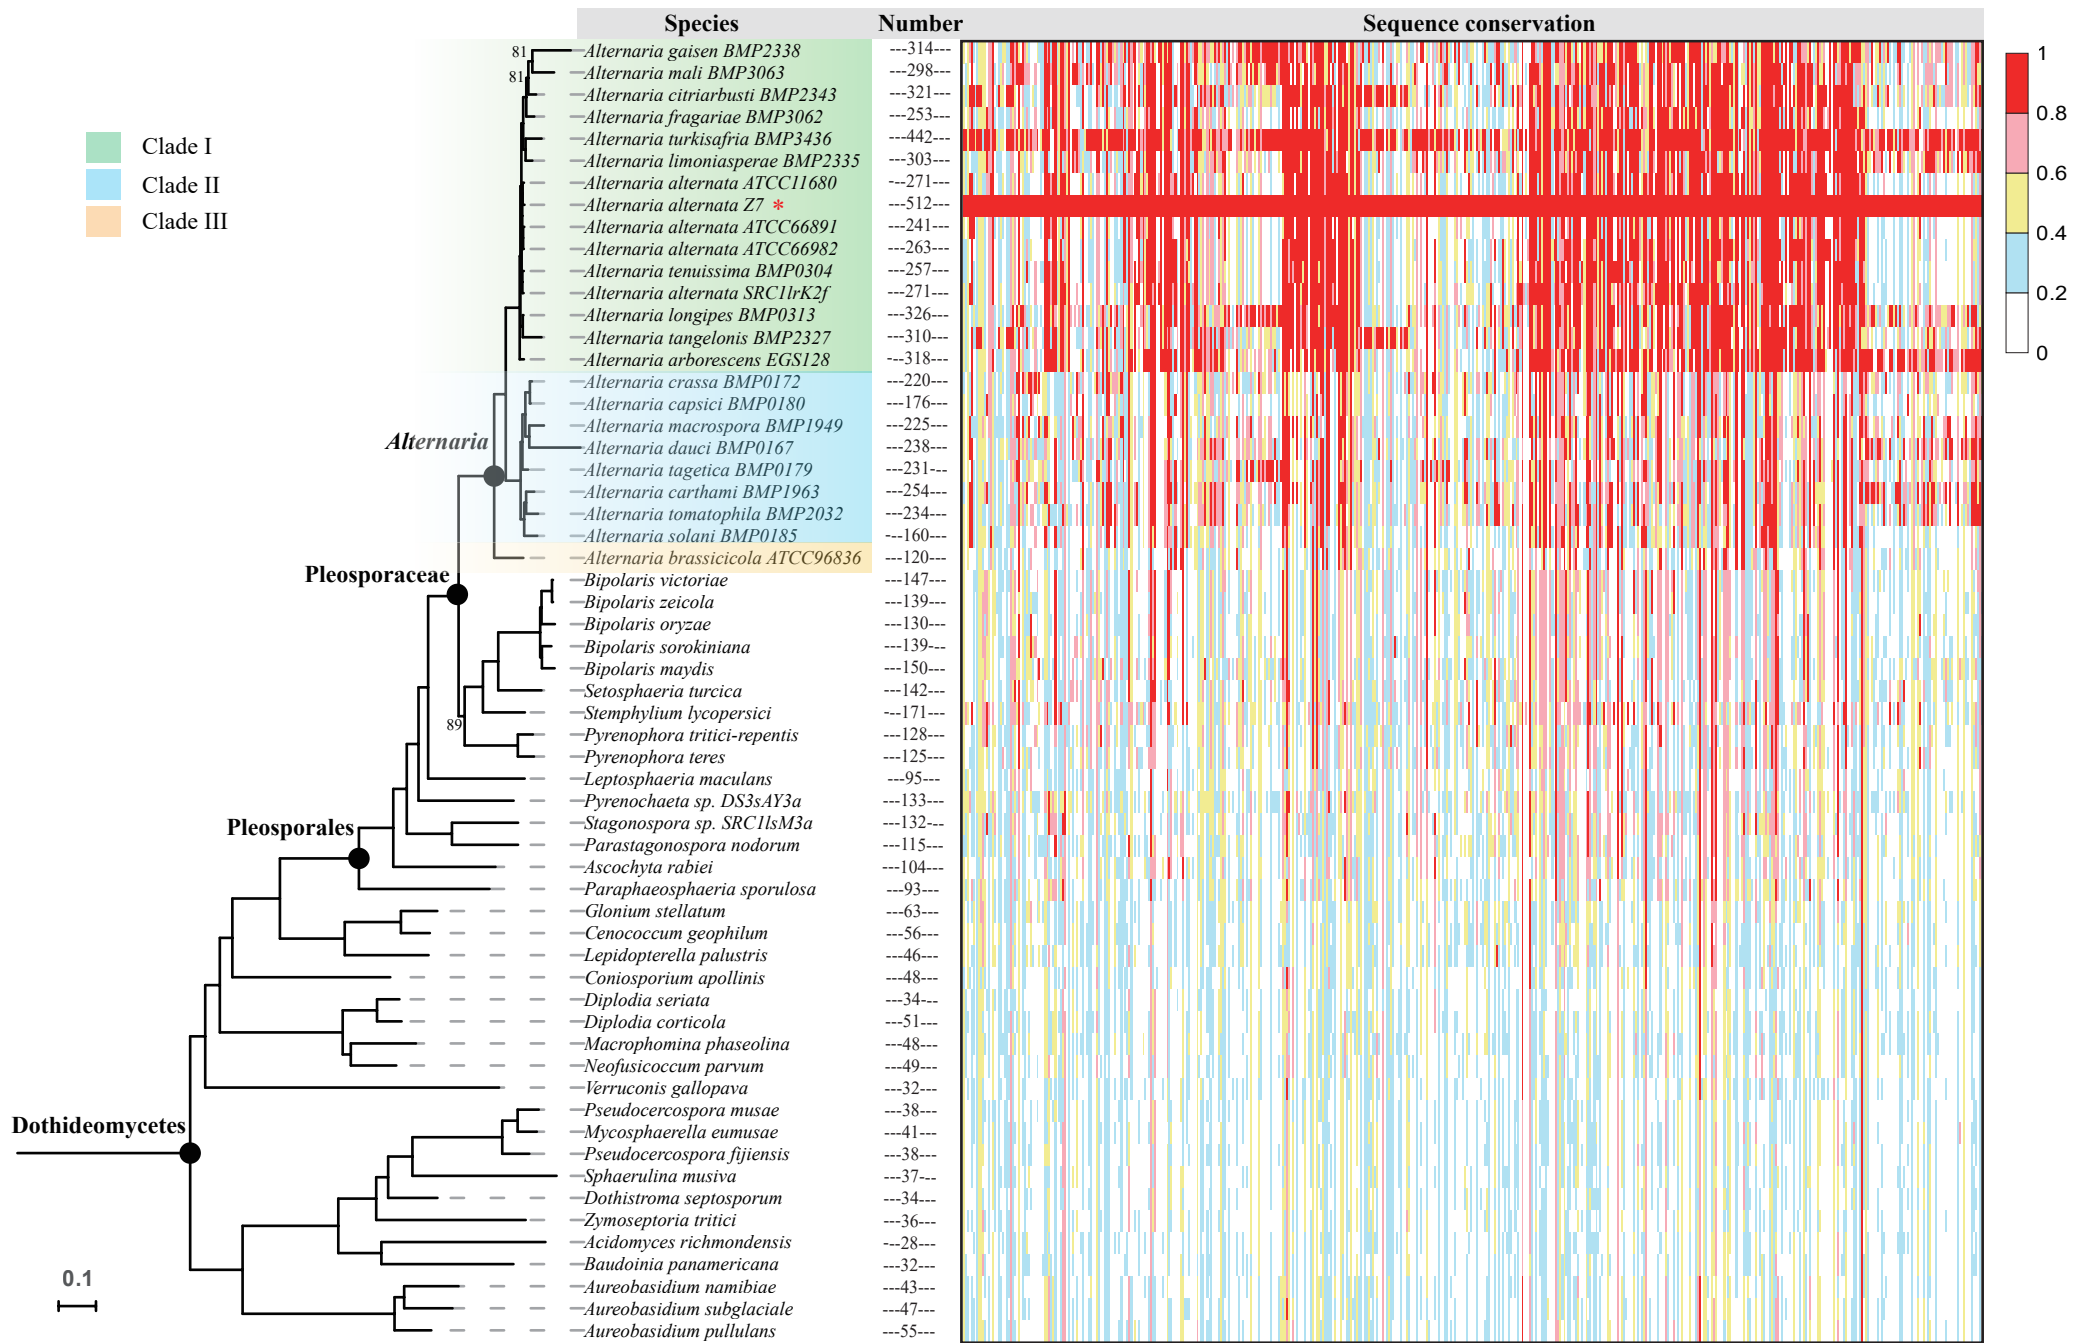

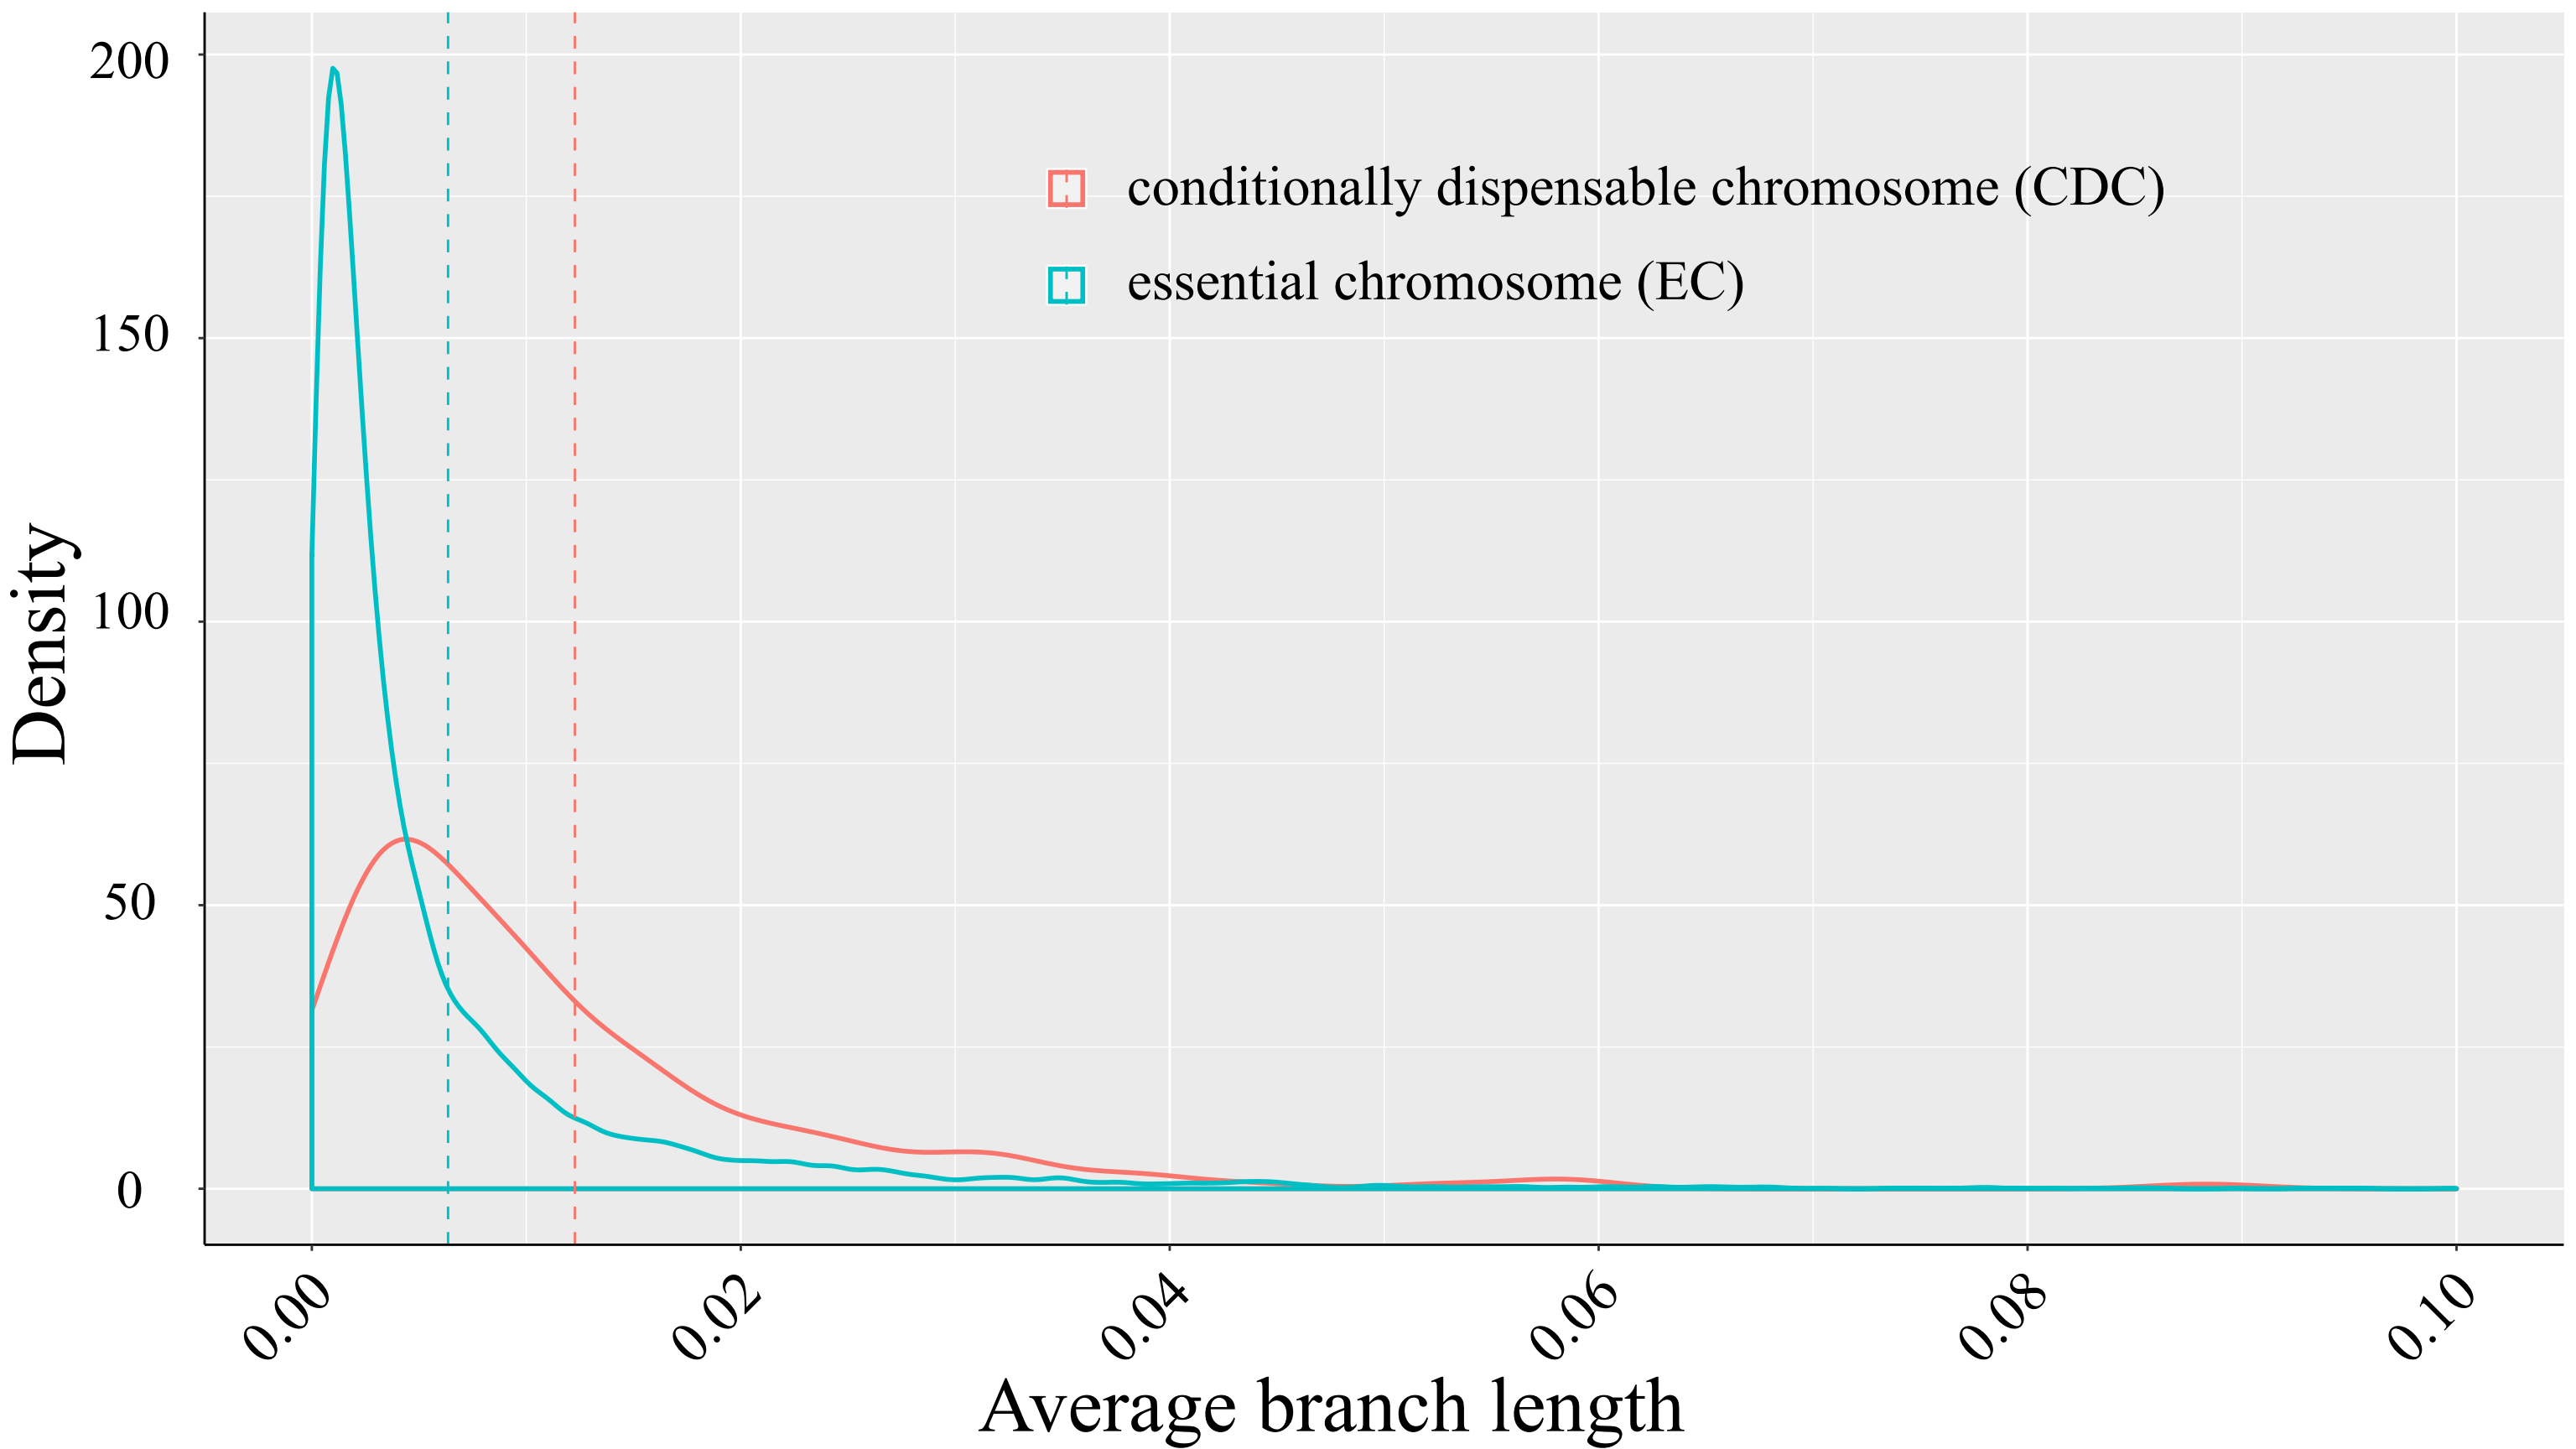

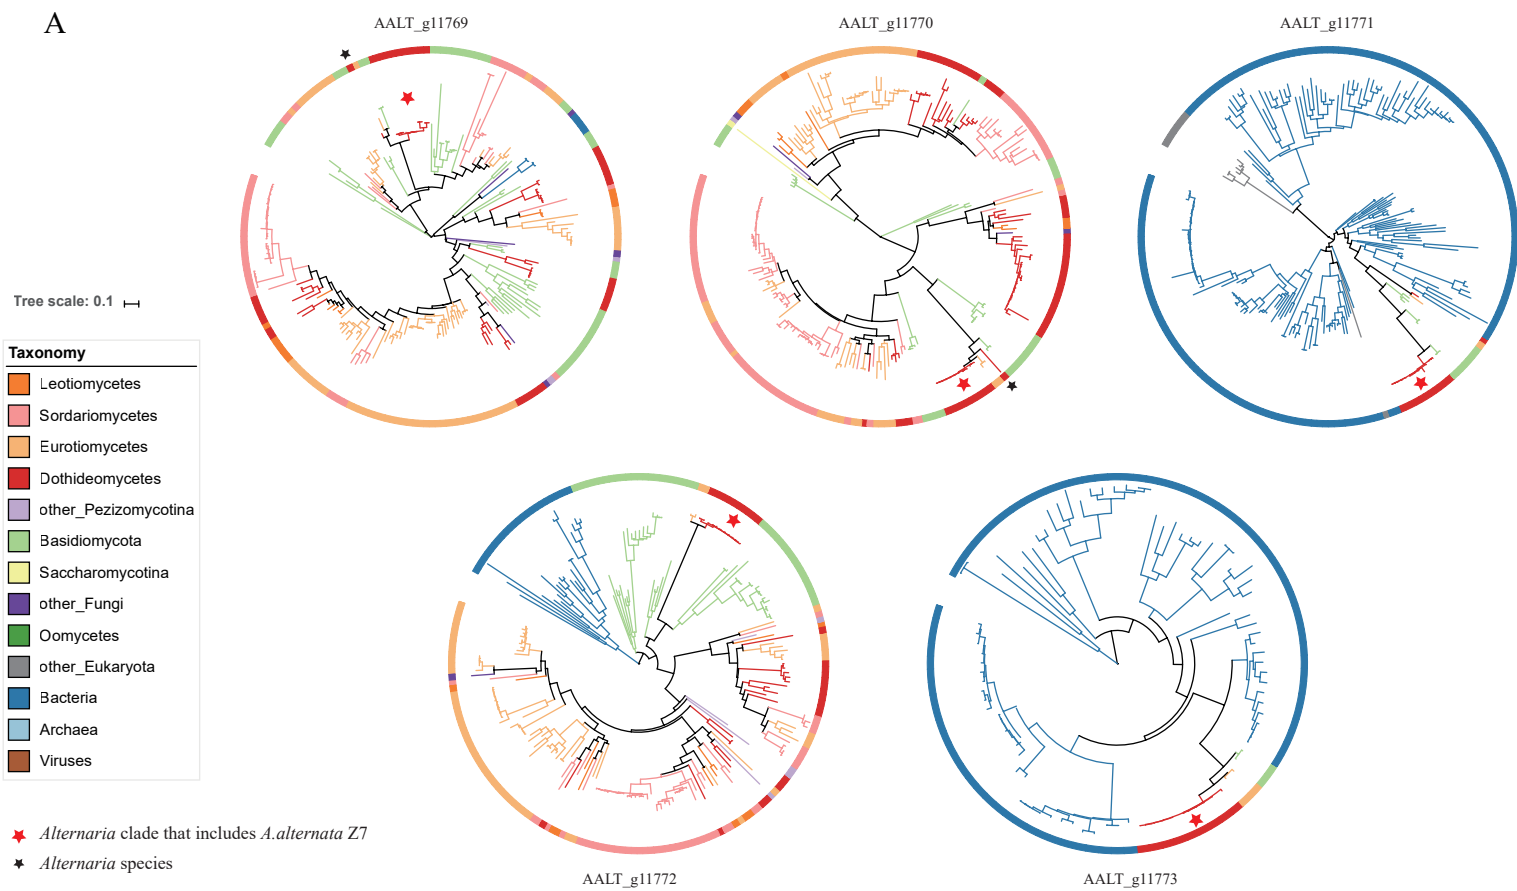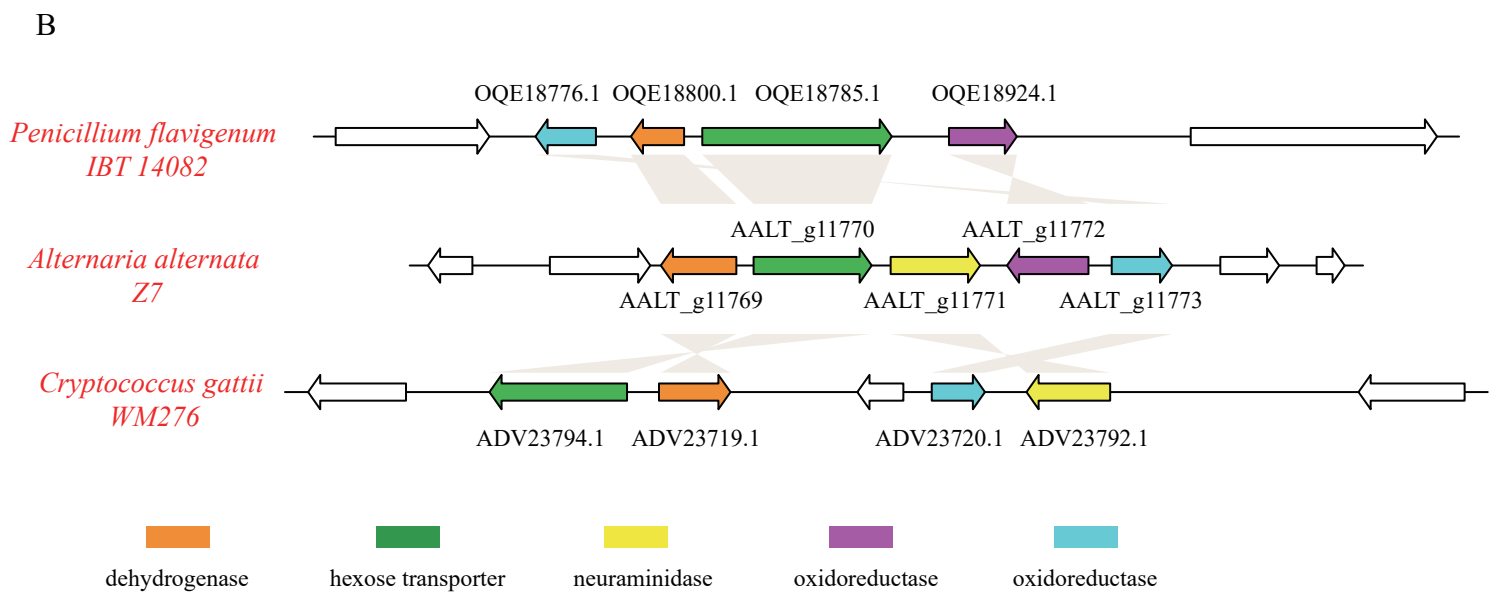



A

Tree scale: 0.1

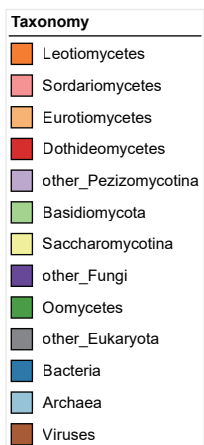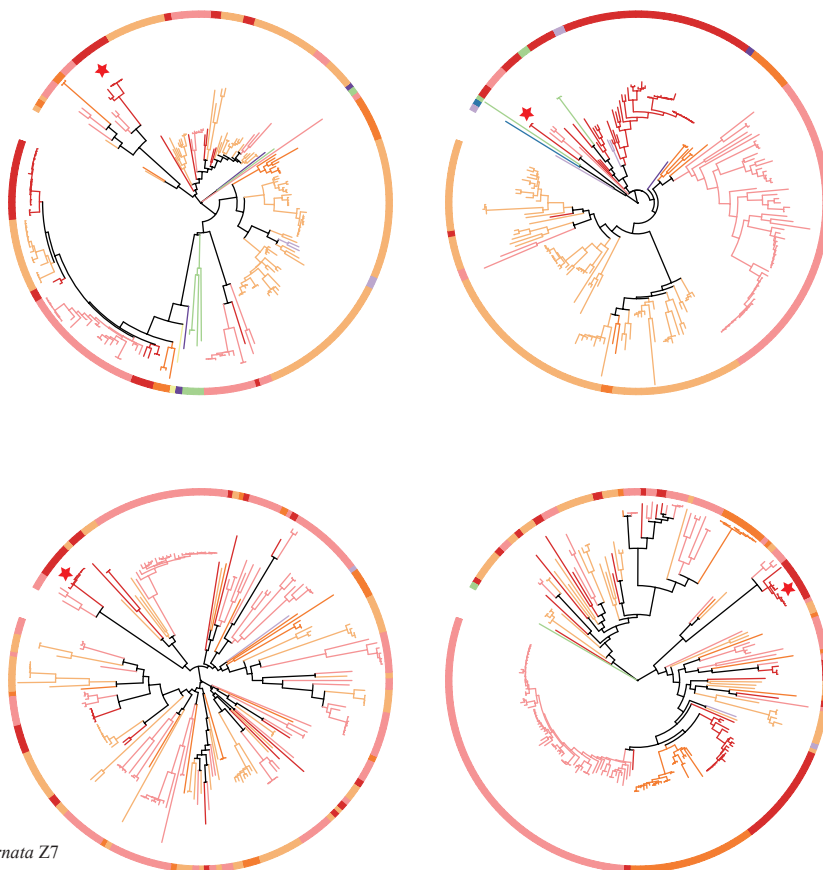

★ *Alternaria* clade that includes *A.alternata* Z7

B

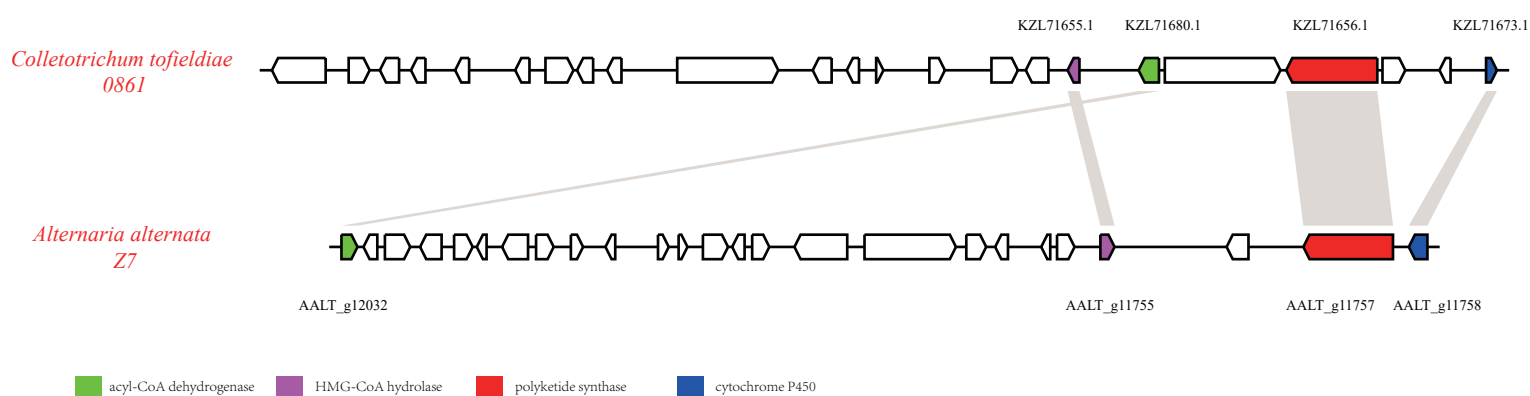

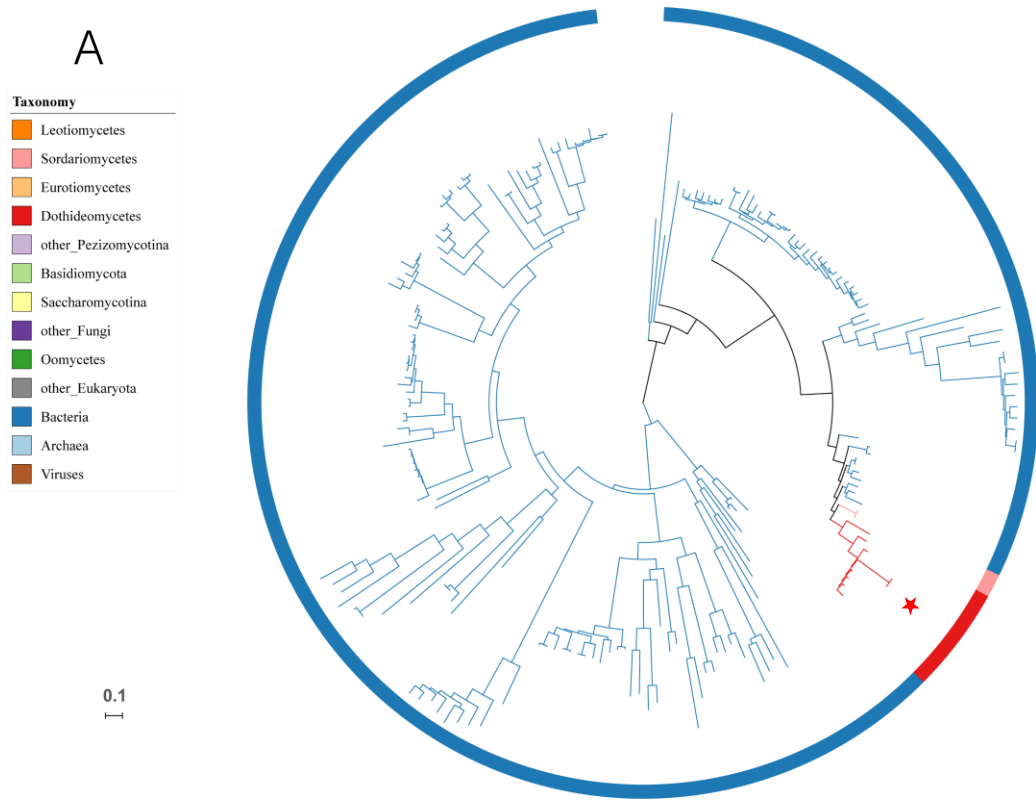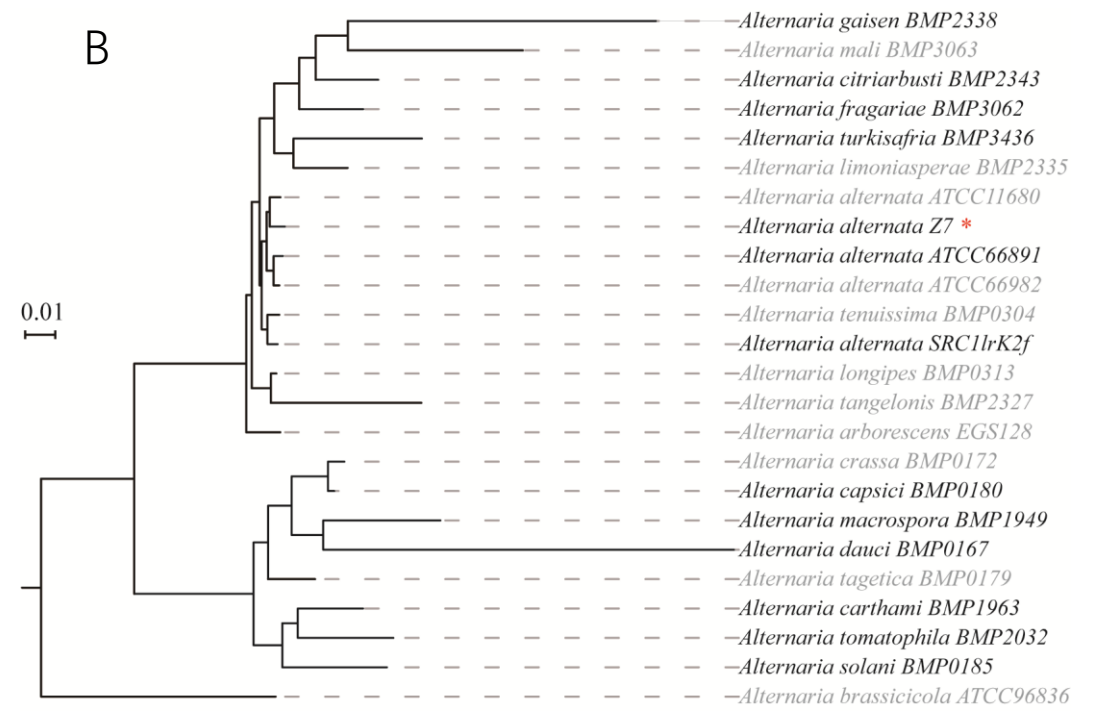

\* *Alternaria* clade that includes *A.alternata* Z7

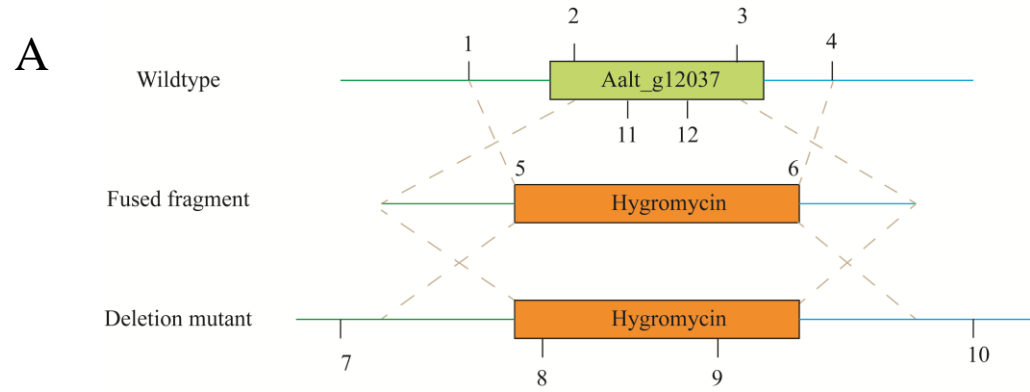

**B**

WT — KO — WT    WT — KO — WT    WT — KO —

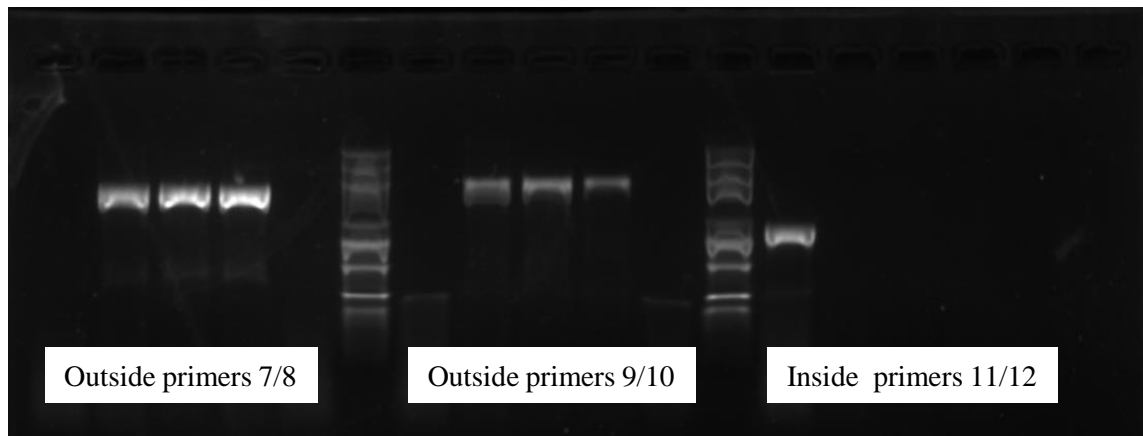

**C**

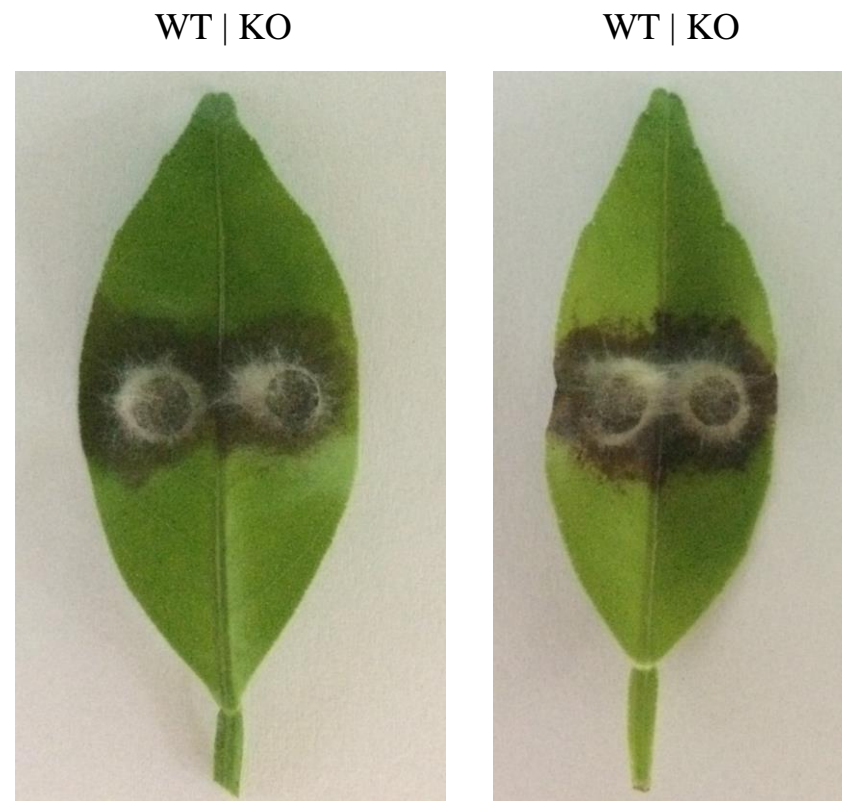

*Citrus × clementina*

*Citrus poonensis*
